# Supplementary material
Source: PubMed Central journal article supplement (PMC4565177)
Supplement: supp_3.2.E208_2014-0118-1-at.pdf [file supp_3.2.E208_2014-0118-1-at.pdf]

**Appendix 1 (as supplied by the authors): Treatment procedures for hepatocellular carcinoma (HCC) and relative survival in patients with HCC**

Table A1. Treatment procedures for persons diagnosed with hepatocellular carcinoma

|                                                                                                                        | CCP code | CCI code   | OHIP code |
|------------------------------------------------------------------------------------------------------------------------|----------|------------|-----------|
| <i>Potentially curative therapy</i>                                                                                    |          |            |           |
| Local excision or destruction of lesion or tissue of liver                                                             | 62.1     |            |           |
| Partial hepatectomy                                                                                                    | 62.12    |            |           |
| Other destruction of lesion of liver                                                                                   | 62.19    |            |           |
| Lobectomy of liver                                                                                                     | 62.20    |            |           |
| Excision partial, liver using endoscopic (laparoscopic) approach                                                       |          | 10A87DA    |           |
| Excision partial, liver using open approach                                                                            |          | 10A87LA    |           |
| Excision partial, liver using ultrasonic aspirator device (for dissection) and open approach                           |          | 10A87LAAZ  |           |
| Liver excision-complete left/right lobectomy                                                                           |          |            | S267      |
| Liver excision-of lesion                                                                                               |          |            | S269      |
| Liver excision-hepatectomy left lateral segmental excision                                                             |          |            | S270      |
| Liver excision-extended right lobectomy                                                                                |          |            | S271      |
| Liver excision-partial lobectomy                                                                                       |          |            | S275      |
| Total hepatectomy                                                                                                      | 62.3     |            |           |
| Liver transplant                                                                                                       | 62.4     |            |           |
| Auxiliary liver transplant                                                                                             | 62.41    |            |           |
| Other transplant of liver                                                                                              | 62.49    |            |           |
| Transplant, liver of a deceased donor full size liver                                                                  |          | 10A85LAXXX |           |
| Transplant, liver of a deceased donor multi organ liver with intestine/pancreas/spleen/stomach (or any combination of) |          | 10A85VCXXX |           |
| Transplant, liver of a living donor split liver                                                                        |          | 10A85WLXXJ |           |
| Transplant, liver of a deceased donor split liver (or reduced paediatric-size liver)                                   |          | 10A85WLXXX |           |
| Living donor orthotopic liver transplantation recipient                                                                |          |            | S266      |
| Liver excision-liver transplant-recipient                                                                              |          |            | S294      |
| Digestive system-liver-repeat liver transplant                                                                         |          |            | S295      |
| Destruction, liver endoscopic (laparoscopic) approach using radiofrequency                                             |          | 10A59DAAW  |           |
| Destruction, liver percutaneous approach using radiofrequency                                                          |          | 10A59HAAW  |           |
| Destruction, liver open approach using radiofrequency                                                                  |          | 10A59LAAW  |           |

|                                                                                                                                                                                                                                                                                                                                                                      |           |
|----------------------------------------------------------------------------------------------------------------------------------------------------------------------------------------------------------------------------------------------------------------------------------------------------------------------------------------------------------------------|-----------|
| Radiofrequency ablation                                                                                                                                                                                                                                                                                                                                              | J069      |
| <i>Non-curative therapy</i>                                                                                                                                                                                                                                                                                                                                          |           |
| Percutaneous ablation                                                                                                                                                                                                                                                                                                                                                |           |
| Destruction, liver endoscopic (abdominal) approach using cryoprobe                                                                                                                                                                                                                                                                                                   | 10A59DAAD |
| Destruction, liver endoscopic (abdominal) approach using laser                                                                                                                                                                                                                                                                                                       | 10A59DAAG |
| Destruction, liver endoscopic (abdominal) approach using device NEC                                                                                                                                                                                                                                                                                                  | 10A59DAGX |
| Destruction, liver endoscopic (abdominal) approach using chemical cautery agent (e.g. ethanol)                                                                                                                                                                                                                                                                       | 10A59DAX7 |
| Destruction, liver percutaneous approach using chemical cautery agent (e.g. ethanol)                                                                                                                                                                                                                                                                                 | 10A59HAX7 |
| Destruction, liver open approach using cryoprobe                                                                                                                                                                                                                                                                                                                     | 10A59LAAD |
| Destruction, liver open approach using laser                                                                                                                                                                                                                                                                                                                         | 10A59LAAG |
| Destruction, liver open approach using device NEC                                                                                                                                                                                                                                                                                                                    | 10A59LAGX |
| Destruction, liver open approach using chemical cautery agent (e.g. ethanol)                                                                                                                                                                                                                                                                                         | 10A59LAX7 |
| Chemotherapy                                                                                                                                                                                                                                                                                                                                                         |           |
| Diagnostic and therapeutic injection(s)/infusion(s) test dose (bleomycin&l-asparaginase once per patient per drug)                                                                                                                                                                                                                                                   | G075      |
| Diagnostic and therapeutic injection/infusion-intravenous chemotherapy- each additional injection to                                                                                                                                                                                                                                                                 | G281      |
| Single agent intravenous chemotherapy i.e. doxorubicin, daunorubicin, epirubicin, mitoxintrone, cisplatin or bleomycin (greater than 10 units per metre square)                                                                                                                                                                                                      | G339      |
| Taxol, rituximab, trastuzumab, bortezomib, docetaxel administration or multiple agent intravenous chemotherapy including at least one of either doxorubicin, daunorubicin, epirubicin, mitoxintrone, cisplatin or bleomycin (greater than 10 units per metre square)                                                                                                 | G345      |
| Special single agent chemotherapy utilizing either high-dose methotrexate with folinic acid rescue - methotrexate given in a dose of greater than 1 g/m2, high dose cisplatin greater than 75 mg/m2 given concurrently with hydration and osmotic diuresis, high dose cytosine, arabinoside (greater than 2g/m2), or high dose cyclophosphamide (greater than 1g/m2) | G359      |
| Single injection (for agents other than doxorubicin, cisplatin, bleomycin or high dose methotrexate)                                                                                                                                                                                                                                                                 | G381      |
| Supervision of chemotherapy (marrow suppressant) for malignant or autoimmune disease by telephone - monthly                                                                                                                                                                                                                                                          | G382      |
| Arteries-cannulation-chemotherapy-hepatic (TACE)                                                                                                                                                                                                                                                                                                                     | R776      |

---

*Supportive/Palliative care*

|                                                               |      |
|---------------------------------------------------------------|------|
| General/Family Practice special palliative care consultation  | A945 |
| Special palliative care consultation hospital in patient      | C945 |
| Palliative care                                               | C982 |
| Palliative care support individual care 1/2 hr. or major part | K023 |

---

CCI, Canadian Classification of Health Interventions – is the new national standard for classifying health care procedures. CCI is the companion classification system to ICD-10-CA. CCI replaces the Canadian Classification of Diagnostic, Therapeutic and Surgical Procedures (CCP) and the intervention portion of ICD-9-CM in Canada. CCP was originally developed by Statistics Canada in 1978 to meet Canadian needs for a procedural classification to be used in conjunction with ICD-9. The Ontario Health Insurance Plan (OHIP), physician billing claims dataset contains service and diagnosis information for outpatient visits in Ontario.

Table A2. Relative survival after diagnosis of hepatocellular carcinoma by sex, year of diagnosis, and age at diagnosis: Sensitivity analysis, merging age at diagnosis 70-79 and  $\geq 80$  years

| Year of Diagnosis | Age at Diagnosis (years) | Cases (N) | Events (N) | 1-year Relative Survival % (95% CI) | 5-year Relative Survival % (95% CI) |
|-------------------|--------------------------|-----------|------------|-------------------------------------|-------------------------------------|
| Cohort Analysis   |                          |           |            |                                     |                                     |
| Female            |                          |           |            |                                     |                                     |
| 1990-1994         | < 60                     | 62        | 48         | 38.27 (27.09, 49.35)                | 17.44 (9.45, 27.48)                 |
|                   | 60-69                    | 57        | 45         | 28.97 (18.74, 40.01)                | 11.01 (4.92, 19.95)                 |
|                   | $\geq 70$                | 58        | 54         | 11.85 (6.62, 18.78)                 | 0.03 (0.00, 0.42)                   |
| 1995-1999         | < 60                     | 56        | 29         | 49.19 (36.10, 61.04)                | 25.92 (15.10, 38.17)                |
|                   | 60-69                    | 73        | 42         | 54.51 (43.21, 64.52)                | 19.28 (11.28, 28.99)                |
|                   | $\geq 70$                | 100       | 80         | 23.09 (16.59, 30.27)                | 6.97 (3.12, 13.11)                  |
| 2000-2004         | < 60                     | 77        | 45         | 51.77 (40.65, 61.79)                | 20.44 (11.90, 30.62)                |
|                   | 60-69                    | 102       | 65         | 42.00 (32.85, 50.89)                | 17.61 (10.75, 25.94)                |
|                   | $\geq 70$                | 173       | 127        | 46.16 (38.61, 53.43)                | 10.12 (5.85, 15.86)                 |
| 2005-2009         | < 60                     | 125       | 47         | 70.93 (62.18, 78.03)                | 27.69 (18.27, 37.93)                |
|                   | 60-69                    | 113       | 63         | 54.27 (44.83, 62.80)                | 19.36 (11.87, 28.29)                |
|                   | $\geq 70$                | 237       | 164        | 47.60 (41.17, 53.81)                | 10.00 (5.92, 15.44)                 |
| Male              |                          |           |            |                                     |                                     |
| 1990-1994         | < 60                     | 167       | 120        | 31.81 (25.52, 38.27)                | 7.13 (3.84, 11.80)                  |
|                   | 60-69                    | 213       | 165        | 28.08 (23.00, 33.37)                | 10.56 (7.04, 14.93)                 |
|                   | $\geq 70$                | 161       | 142        | 18.61 (13.7, 24.16)                 | 4.15 (1.73, 8.38)                   |
| 1995-1999         | < 60                     | 262       | 175        | 35.82 (30.62, 41.05)                | 15.14 (11.14, 19.71)                |
|                   | 60-69                    | 266       | 191        | 34.53 (29.32, 39.80)                | 12.61 (8.90, 17.04)                 |
|                   | $\geq 70$                | 292       | 218        | 32.29 (27.54, 37.15)                | 10.26 (6.93, 14.43)                 |
| 2000-2004         | < 60                     | 468       | 239        | 52.47 (48.07, 56.67)                | 27.53 (23.33, 31.89)                |
|                   | 60-69                    | 349       | 234        | 43.98 (38.92, 48.94)                | 17.33 (13.40, 21.71)                |
|                   | $\geq 70$                | 412       | 280        | 44.41 (39.74, 49.01)                | 11.64 (8.48, 15.41)                 |
| 2005-2009         | < 60                     | 683       | 373        | 56.94 (53.20, 60.50)                | 25.13 (21.39, 29.04)                |
|                   | 60-69                    | 479       | 269        | 52.68 (48.26, 56.91)                | 22.85 (18.76, 27.22)                |
|                   | $\geq 70$                | 660       | 439        | 51.72 (47.8, 55.52)                 | 14.35 (11.17, 17.98)                |

CI, confidence intervals.
