# Supplementary material
Source: PubMed Central journal article supplement (PMC4565177)
Supplement: supp_3.2.E208_2014-0118-2-at.pdf [file supp_3.2.E208_2014-0118-2-at.pdf]

**Appendix 2 (as supplied by the authors): Figure A1. Ten-year relative survival curves for hepatocellular carcinoma, by sex**

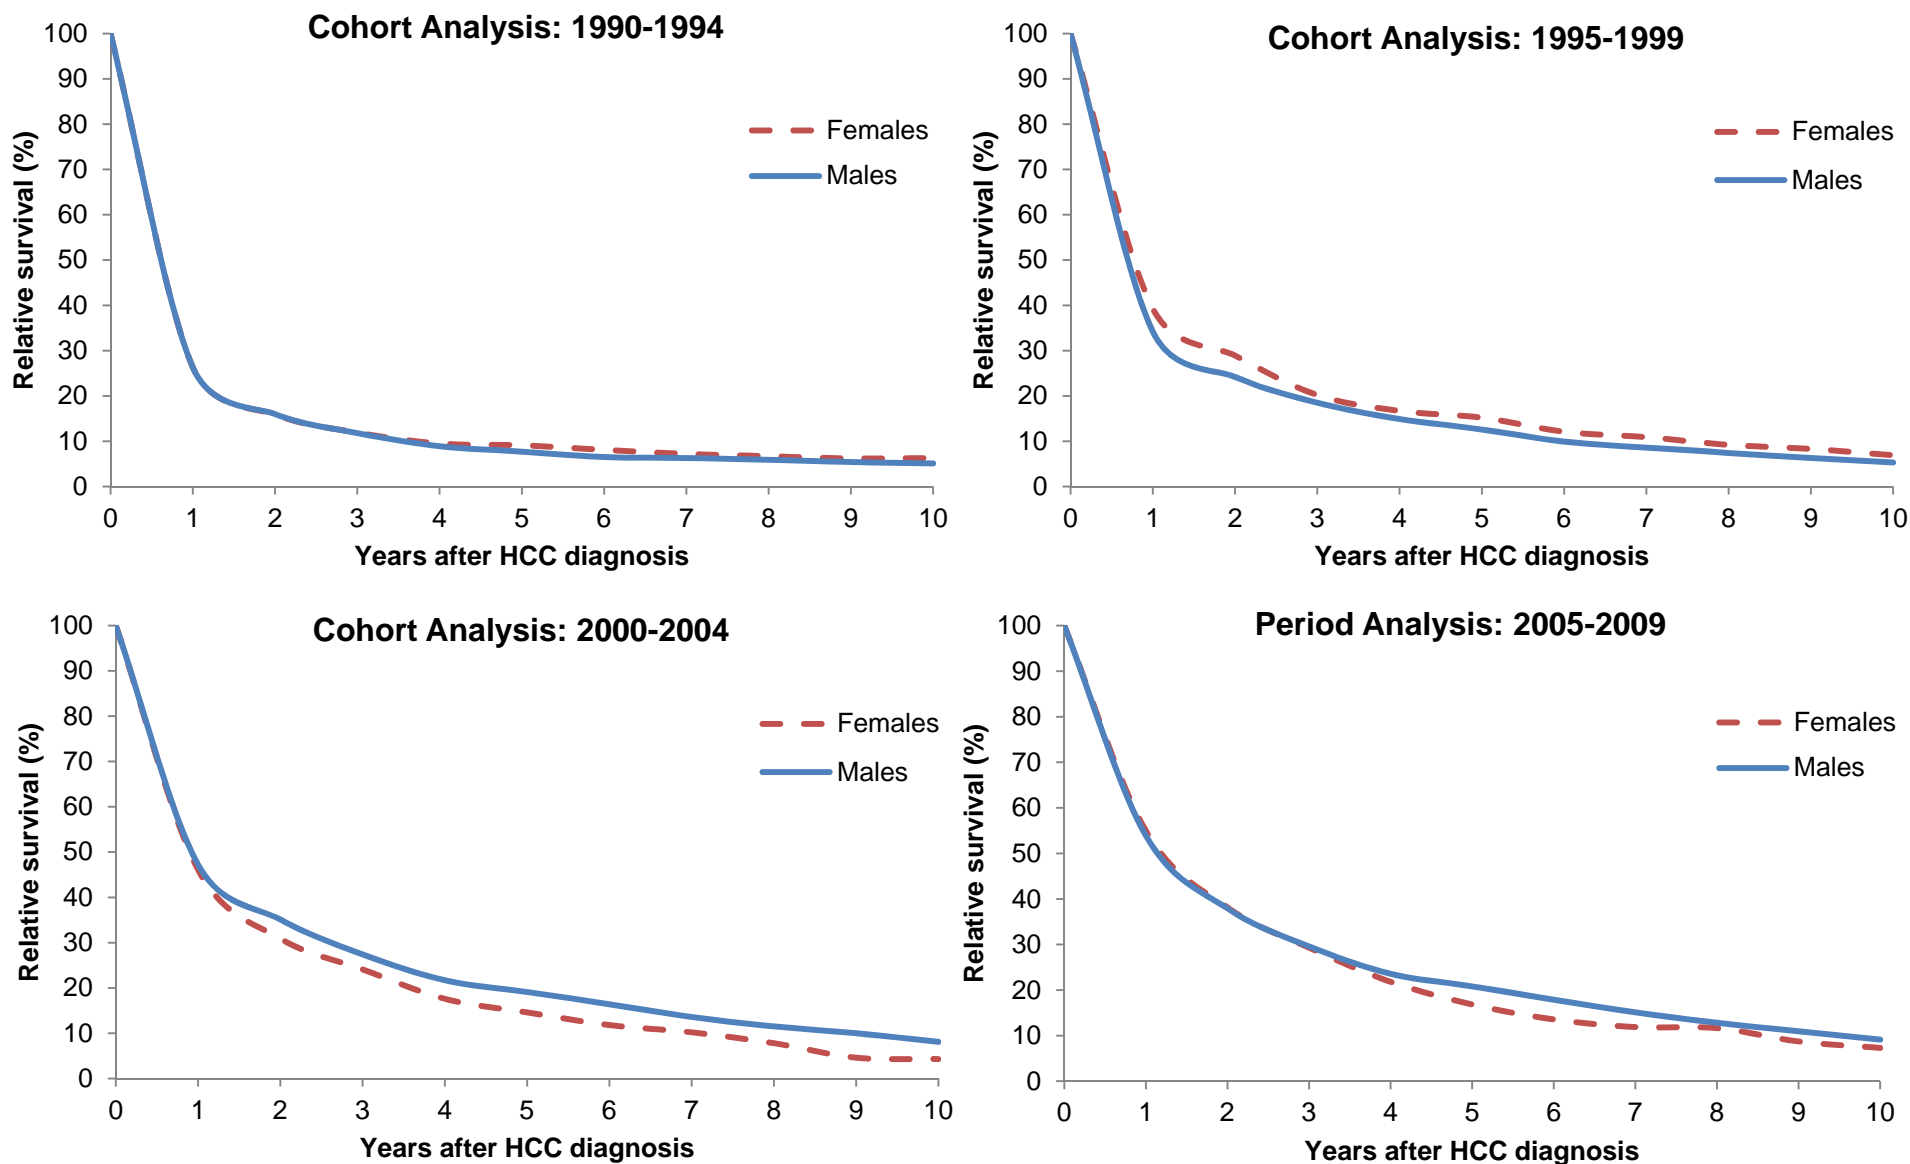

Appendix to: Thein H-H, Khoo E, Campitelli MA, Zaheen A, Yi Q, De P, Earle CC. Trends in relative survival in patients with a diagnosis of hepatocellular carcinoma in Ontario: a population-based retrospective cohort study. *CMAJ Open* 2015. DOI:10.9788/cmajo.20140118. Copyright © 2015 8872147 Canada Inc. or its licensors
