# Supplementary material
Source: PubMed Central journal article supplement (PMC4565177)
Supplement: supp_3.2.E208_Original_submission.pdf [file supp_3.2.E208_Original_submission.pdf]

1  
2  
3 **Title:** Trends in relative survival of patients diagnosed with hepatocellular carcinoma: A  
4  
5 population-based cohort study  
6  
7

8  
9  
10 Hla-Hla Thein MD PhD,<sup>1,2,3</sup> Edwin Khoo MPH,<sup>1</sup> Michael A. Campitelli MPH,<sup>1</sup> Ahmad Zaheen MD  
11  
12 MSc,<sup>4</sup> Qilong Yi MD PhD,<sup>5</sup> Prithwish De MHS, PhD,<sup>6,1</sup> Earle CC MD MSc.<sup>2,3</sup>  
13  
14

- 15  
16  
17 1. Dalla Lana School of Public Health, University of Toronto, Toronto, Ontario, Canada  
18  
19 2. Ontario Institute for Cancer Research/Cancer Care Ontario, Toronto, Ontario, Canada  
20  
21 3. Institute for Clinical Evaluative Sciences, Toronto, Ontario, Canada  
22  
23 4. Faculty of Medicine, University of Toronto, Toronto, Ontario, Canada  
24  
25 5. National Epidemiology and Surveillance, Canadian Blood Services, Ottawa, Canada  
26  
27 6. Canadian Cancer Society, Toronto, Ontario, Canada  
28  
29  
30  
31  
32

33 **Corresponding author:** Hla-Hla Thein MD, MPH, PhD, Dalla Lana School of Public Health,  
34  
35 University of Toronto, 155 College Street 5th Floor Rm 560, Toronto, ON M5T 3M7, CANADA,  
36  
37 Phone: +1 (416) 978-2020, Fax: +1 (416) 978-7735, Email: [rosie.thein@utoronto.ca](mailto:rosie.thein@utoronto.ca)  
38  
39  
40  
41

42  
43 Word count: Abstract 248  
44  
45 Text 2,637  
46  
47  
48

49 **Running Title:** HCC relative survival  
50  
51

52 **Key words:** cohort study; epidemiology; liver cancer; medical record linkage; mortality; survival  
53  
54  
55  
56  
57  
58  
59  
60

1  
2  
3 **Funding Statement:** This study was supported through provision of data by the Institute for  
4  
5 Clinical Evaluative Sciences (ICES) and Cancer Care Ontario (CCO) and through funding support  
6  
7 to ICES from an annual grant by the Ministry of Health and Long-Term Care (MOHLTC) and the  
8  
9 Ontario Institute for Cancer Research (OICR). The opinions, results and conclusions reported in  
10  
11 this paper are those of the authors and are independent from the funding sources. No endorsement  
12  
13 by ICES, CCO, OICR or the Government of Ontario is intended or should be inferred. Hla-Hla  
14  
15 Their is supported by the Ontario Institute for Cancer Research Health Services Research Program  
16  
17 New Investigator Award at the Dalla Lana School of Public Health, University of Toronto.  
18  
19  
20  
21  
22  
23

24 **Contributor Statement:** Hla-Hla Their contributed to the study concept and design, obtained data  
25  
26 and conducted/supervised the statistical analysis, interpreted the results and wrote sections of the  
27  
28 manuscript. Edwin Khoo designed and conducted the statistical analysis, interpreted the findings  
29  
30 and wrote sections of the manuscript. Michael Campitelli assisted with the initial statistical analysis  
31  
32 and interpreted the findings. Ahmad Zaheen assisted with interpreting the findings and revising the  
33  
34 manuscript. Qilong Yi assisted with the statistical analysis plan and interpreted the findings.  
35  
36 Prithwish De assisted in interpreting the findings and revising the manuscript. Craig Earle assisted  
37  
38 in obtaining data, interpreting the findings, and revising the manuscript. All of the authors approved  
39  
40 the final version submitted for publication.  
41  
42  
43  
44  
45  
46  
47

48 **Competing Interests:** The authors declare that they have no competing interests.  
49  
50  
51  
52  
53  
54  
55  
56  
57  
58  
59  
60

## Abstract

**Background:** Hepatocellular carcinoma (HCC) incidence and mortality continues to increase globally. However, the population-level impact on survival has been challenging to assess. Our objectives were to estimate the relative survival of HCC patients in Ontario, Canada over time and to examine potential factors associated with excess mortality risk.

**Methods:** A retrospective cohort study of patients diagnosed with HCC in Ontario, Canada, from 1990-2009 was performed using Ontario Cancer Registry (OCR) data. Standardized mortality ratios (SMRs) were calculated using observed deaths from the OCR and expected deaths from Ontario life tables. Relative survival was estimated by controlling for background mortality. A generalized linear model was used to estimate the excess mortality risk for important factors.

**Results:** 5,645 patients were diagnosed with HCC over the study period of which 78% were males. The SMR for both sexes was highest during 1990-1994 (F:29.3 95%CI 18.7-39.9; M:19.6, 95%CI 10.9-28.3), but decreased by 2005-2009 (F:16.6 95%CI 8.6-24.6; M:14.3, 95%CI 6.9-21.8). Significant improvements were observed for 1-year relative survival across all age groups over the study period; the highest was among those diagnosed at age <60 years during 2005-2009. Overall, the 5-year relative survival did not exceed 28%, however. The excess mortality risk decreased with increased years of follow-up, recent diagnosis, and curative or non-curative HCC treatments, while increased with age.

**Interpretation:** Although improving, the prognosis for HCC remains poor. Our findings highlight the importance of prevention and treatment of HCC to reduce the burden of disease and improve the healthcare systems and society.

## Introduction

Liver cancer is the sixth most common cancer and third most frequent cause of cancer-related death worldwide.<sup>1</sup> Hepatocellular carcinoma (HCC) represents more than 80% of primary liver cancers and is an increasing public health concern. It is among the fastest growing cancers in Canada,<sup>2-4</sup> with incidence rates increasing for both females (2.2% per year) and males (3.4% per year) over the past 30 years.<sup>2,3</sup> Although screening and treatment options for HCC have advanced, a minority of patients are treated early,<sup>5</sup> with treatment often initiating at advanced stages of disease.<sup>6</sup> Survival after HCC diagnosis is poor, with a 5-year survival estimate of approximately 7%.<sup>6</sup> However, studies have shown that with early diagnosis and treatment, 5-year survival can be improved by more than 50%.<sup>7-18</sup>

Cancer survival estimates are often complicated by other causes of mortality. Identifying definitive cancer-associated mortality can be challenging and relies on accurate information regarding patient cause of death.<sup>19,20</sup> The issue is further confounded by the question of whether treatment-associated mortality should be attributable to the disease, an issue not often addressed with mortality estimates.

One solution is the use of relative survival methodology, which focuses on the population burden of mortality from a specific cancer by comparing survival among cancer diagnosed patients to an otherwise similar general population known not to have cancer.<sup>19-23</sup> The advantage of this methodology is that mortality both directly and indirectly attributable to cancer can be accounted for.<sup>19-21</sup> Relative survival analysis is useful for identifying the extent to which advances in cancer treatments have impacted the disease at a population level, as it places changes in survival in the context of population level change.<sup>24</sup> The objectives of this study are to estimate the relative survival of patients diagnosed with HCC in Ontario, Canada over a 20-year period and to examine potential factors associated with excess mortality risk.

## Methods

### Study design and population

A retrospective cohort study of all eligible patients diagnosed with HCC in Ontario, Canada, between January 1, 1990 and December 31, 2009 was conducted. The Ontario Cancer Registry (OCR)<sup>25</sup> was used to create the study cohort. The OCR captures approximately 95% of all diagnosed cancer cases in Ontario and has been shown to be both highly accurate and reliable.<sup>26,27</sup> The International Statistical Classification of Diseases and Related Health Problems, 9th Revision (ICD-9) site code 155.0 was used to identify primary hepatic neoplasms in addition to the International Classification of Diseases for Oncology, Third Edition (ICD-O-3) histology codes 8170-8175. HCC patients were followed from the date of their diagnosis to the date of their death, or until the end of the study period December 31, 2010. Patients were excluded if they were diagnosed with HCC on the same day they died.

Ethics approval for the study was granted by the University of Toronto Health Sciences Research Ethics Board.

### Outcome measure

The analyses focused on the relative survival of HCC patients, which is the ratio of survival in patients diagnosed with HCC (i.e. observed survival) compared to the survival from the Ontario general population (i.e. expected survival) accounting for background mortality.<sup>19,20</sup> The secondary outcome was the relative excess hazard ratios (HRs) for mortality (excess mortality risk) to examine the impact of the potential prognostic factors.

### Study variables

1  
2  
3 The OCR includes information on age at diagnosis, gender, date of diagnosis, cause of death, and  
4 date of death. Date of HCC diagnosis and date of death were ascertained from the OCR to calculate  
5 the length of survival after diagnosis. The OCR cohort was linked to health administrative data to  
6 assess baseline Charlson-Deyo Comorbidity Index (CCI) using the hospitalization record at  
7 diagnosis date from the Canadian Institute for Health Information Discharge Abstract Database<sup>28</sup>  
8 and considering two years before diagnosis if cases did not have a hospitalization record at  
9 diagnosis date.<sup>29,30</sup> The CCI was calculated using the methods described by Charlson *et al.*<sup>31</sup> and  
10 Deyo *et al.*,<sup>32</sup> applying an ICD-9 coding algorithm to the diagnostic field codes from the  
11 hospitalization data (excluding diagnoses for liver disease and metastatic cancer). Conditions were  
12 weighted and then summed up to provide an overall CCI for a given episode, which was then  
13 categorized into one of five groups (CCI of 0, 1, 2,  $\geq 3$ , or no hospitalization record) representing  
14 different degrees of comorbidity. HCC treatments considered were: potentially curative treatment  
15 (i.e. liver resection, liver transplant, or radiofrequency ablation); non-curative treatment (i.e.  
16 chemotherapy or transarterial chemoembolization); palliative care; and no treatment. We have used  
17 these definitions of comorbidity and HCC treatments in our previous studies.<sup>29,30</sup> Codes used to  
18 identify HCC treatments can be found in Appendix Table A1.

## 42 **Statistical analysis**

### 43 *Standardized-mortality-ratios*

44  
45 Standardized-mortality-ratios (SMRs) were calculated using observed deaths from the OCR and  
46 expected deaths from Ontario life tables (1990-2010).<sup>33</sup> SMRs were estimated by year of diagnosis  
47 (1990-1994, 1995-1999, 2000-2004, and 2005-2009) and age at diagnosis (<60, 60-69, 70-79, and  
48  $\geq 80$  years) for both sexes. The percent change for each time period was calculated using the  
49 previous time period as the comparator.

### *Relative survival analysis*

Relative survival estimates for 1-year and 5-year survival, by year of diagnosis, age at diagnosis, and gender were estimated by comparing the actual survival of patients diagnosed with HCC to that expected in the Ontario general population using the methodology described by Dickman *et al.*<sup>21</sup> Expected survival estimates were calculated for a cohort of patients diagnosed with HCC from the Ontario general population life tables<sup>33</sup> matched by year of diagnosis, age at diagnosis, and gender using the Ederer II method<sup>34</sup>—considering the matched individuals to be at risk until the corresponding cancer patient died or was censored. Survival estimates were calculated as a ratio and expressed as a percentage, and considered significantly different if the 95% confidence intervals (CIs) did not overlap.

A period analysis approach was also used to estimate 5-year relative survival for those diagnosed in 2005-2009 and those who were diagnosed earlier but were alive on January 1, 2005. Partial survival probabilities for each year of diagnosis during the most recent period (2005-2009) with available follow-up data were combined for this analysis<sup>35-38</sup> with the advantage of better survival estimates for newly diagnosed patients.<sup>35-37</sup>

### *Regression modelling of relative survival*

A generalized linear model was used with a Poisson error structure to estimate the adjusted effect of the potential prognostic covariates (including year of diagnosis, follow-up year after diagnosis, age at diagnosis, gender, CCI, and HCC treatments) on the relative excess mortality risk.<sup>21</sup> The hazard function at any given time after diagnosis was modelled as the sum of the expected hazard from the general population (Ontario life tables) and the excess hazard from an HCC diagnosis.<sup>21</sup> The hazard was assumed to be piecewise constant hazards for each year. Survival data was collapsed in order to

1  
2 allow for standard regression diagnostics to be performed.<sup>21</sup> A p-value of <0.05 was considered  
3 statistically significant. Interactions were considered between age at diagnosis and gender, year of  
4 diagnosis, follow-up after diagnosis, CCI and HCC treatments to allow changes in excess hazard  
5 after diagnosis to vary across age groups.<sup>21</sup> The interactions between age at diagnosis and gender,  
6 year of diagnosis and palliative care were found to be significant and they were used in the model.  
7 We evaluated the model goodness-of-fit using the deviance statistic, with the value divided by the  
8 degrees of freedom close to 1 (>0.85 and <1.5) being considered a reasonable fit.  
9  
10  
11  
12  
13  
14  
15  
16  
17  
18  
19  
20

## 21 **Results**

### 22 *Standardized-mortality-ratios*

23  
24 Table 1 summarises the number of HCC-diagnosed patients by year of diagnosis, gender, and age at  
25 diagnosis along with the SMR and period percent changes. Further patient demographics are  
26 summarised in Appendix Table A2. Between 1990 and 2009, there were 5,645 patients diagnosed  
27 with primary HCC, with a 3-fold increase in the number of cases over time for both sexes, peaking  
28 in the 2005-2009 period. The majority of patients were male (78.2%) and most HCC cases were  
29 diagnosed at age  $\geq 70$  years for females (46.1%), and <60 years for males (35.8%). Overall, the  
30 SMR for both sexes was highest during 1990-1994 and decreased moderately thereafter.  
31  
32  
33  
34  
35  
36  
37  
38  
39  
40  
41  
42  
43  
44

### 45 *Relative survival*

46  
47 The 1-year and 5-year relative survival estimates after HCC diagnosis are summarised in Table 2.  
48 For both sexes, there were significant improvements in the 1-year relative survival for all age  
49 groups when comparing 1990-1994 to 2005-2009 (Figures 1). 1-year relative survival of females  
50 was not significantly higher than the 1-year relative survival of males (Figure 2). The highest 1-year  
51  
52  
53  
54  
55  
56  
57  
58  
59  
60



1  
2  
3 survival for females was 70.9% (95% CI: 62.2, 78.0%) compared to 56.9% (95% CI: 53.2, 60.5%)  
4  
5 for males, both of which correspond to those diagnosed at age <60 years during 2005-2009.  
6

7  
8 During 1990-1994, females diagnosed at age <60 years had a significantly higher 5-year  
9  
10 relative survival of 17.4% (95% CI: 9.5, 27.5%) compared to males whose survival was 7.1% (95%  
11  
12 CI: 3.8, 11.8%). Over time, the 5-year survival for males diagnosed at age <60 years saw significant  
13  
14 improvements; in addition, significant improvements were seen in those diagnosed at age 60-69 and  
15  
16 70-79 years in the period of 2005-2009 when compared to 1990-1994. However, for females, a  
17  
18 significant improvement was seen in those diagnosed at age  $\geq 80$  years in the periods of 2000-2004  
19  
20 and 2005-2009 when compared to 1990-1994. There were no significant differences in the relative  
21  
22 survival estimates between the cohort analysis and period analysis for 2005-2009 (Figure 3), as well  
23  
24 as no significant differences between males and females. Overall, the 5-year relative survival did  
25  
26 not exceed 28% for either sex.  
27  
28  
29  
30  
31  
32

### 33 *Relative excess hazard ratios for mortality*

34  
35 Model 1 in Table 3 shows the adjusted effect of the prognostic covariates on the relative excess  
36  
37 mortality risk and Model 2 in Table 4 shows the same covariates but with the interaction terms. For  
38  
39 Model 1, with the exception of gender ( $p=0.433$ ) and age at diagnosis (overall  $p=0.08$ ), all  
40  
41 covariates were significant ( $p<0.001$ ). Subsequent periods after 1990-1994 were associated with a  
42  
43 protective relative excess mortality risk indicating decreased risk over time compared to 1990-1994;  
44  
45 >1 year follow-ups after diagnosis were significantly associated with a decreased risk compared to 1  
46  
47 year after diagnosis; and HCC treatments (curative and non-curative) were associated with a  
48  
49 decreased risk. Palliative care and no treatment were associated with an increased risk. CCI's >1  
50  
51 were associated with a protective relative risk of mortality likely representing patients who lived  
52  
53 longer and thereby accumulated a greater maximal comorbidity score.<sup>29</sup>  
54  
55  
56  
57  
58  
59  
60

1  
2  
3 In Model 2 (Table 4), interactions between age at diagnosis and gender (overall  $p=0.009$ ),  
4  
5 year of diagnosis (overall  $p=0.003$ ) and palliative care (overall  $p<0.001$ ) were found to be  
6  
7 significant using the likelihood ratio Type 3 analysis, and all covariates with the exception of  
8  
9 gender were also significant. Like Model 1, subsequent periods after 1990-1994, >1 year follow-ups  
10  
11 after diagnosis, and curative and non-curative treatments were significantly associated with a  
12  
13 protective relative excess mortality risk. For both sexes, being diagnosed at increasing age ( $\geq 70$   
14  
15 years) was associated with an increased relative excess mortality risk when compared to those  
16  
17 diagnosed at age <60 years. Both models seemed reasonable with the value/degrees of freedom  
18  
19 close to 1. For Model 1, the value was 3901.73 and the degrees of freedom for the residuals were  
20  
21 2851. For Model 2 with the interaction term, the deviance was 3844.21 and the degrees of freedom  
22  
23 for the residuals were 2836.  
24  
25  
26  
27  
28  
29  
30

### 31 **Interpretation**

32  
33 This study attempted to estimate the relative survival of patients diagnosed with HCC between 1990  
34  
35 and 2009 in Ontario, Canada. The results indicate significant improvements in 1-year relative  
36  
37 survival by 2005-2009 using the period of 1990-1994 as a reference. One-year survival was highest  
38  
39 amongst those diagnosed at age <60 years in the period of 2005-2009, with survival exceeding 50%  
40  
41 for both sexes; however, 5-year relative survival improvements were minimal, with significant  
42  
43 improvements occurring only for males diagnosed at age 60-69 and 70-79 years. The 5-year relative  
44  
45 survival in both sexes never exceeded 28%. This is concerning from a population perspective  
46  
47 because the frequency of new HCC cases is expected to continue to increase due to hepatitis C viral  
48  
49 control challenges and aging of the Canadian population.<sup>4</sup>  
50  
51  
52  
53  
54

55 When compared to the 5-year relative survival estimates for primary liver cancer in Canada  
56  
57 during 2006-2008 made by the Canadian Cancer Society (CCS),<sup>4</sup> our estimates for both sexes age  
58  
59  
60

1  
2  
3  $\geq 80$  years in Ontario were slightly higher. CCS estimates for 5-year relative survival for females  
4 diagnosed at age 60-69, 70-79, and 80-99 are 21.0% (95% CI: 15.0, 28.0%), 12.0% (95% CI: 7.0,  
5 18.0%), and 7.0% (95% CI: 3.0, 13.0%), respectively.<sup>4</sup> In comparison, our estimates during 2005-  
6 2009 were 19.9% (95% CI: 12.4, 28.7%), 12.2% (95% CI: 6.7, 19.6%), and 8.2% (95% CI: 2.0,  
7 21.3%), respectively. A similar pattern was present for males. These divergences may be  
8 attributable to differences in the data sources as well as slightly different time periods used. In  
9 addition, the estimates made by the CCS were done utilising data from the Canadian Cancer  
10 Registry and the Canadian Vital Statistics Death database.<sup>4</sup> CCS estimates account for all of Canada  
11 (except Quebec), whereas our analysis was limited to Ontario cases. Differences in our study are  
12 consistent with findings for other highly fatal cancers that show survival rates biased towards higher  
13 values in Ontario (Diane Nishri, Cancer Care Ontario, personal communication), presumed to be  
14 related to lost follow-up; however, cancers with a poorer prognosis tended to be associated with  
15 relatively small differences.<sup>39</sup>

16  
17  
18  
19  
20  
21  
22  
23  
24  
25  
26  
27  
28  
29  
30  
31  
32  
33  
34  
35  
36  
37  
38  
39  
40  
41  
42  
43  
44  
45  
46  
47  
48  
49  
50  
51  
52  
53  
54  
55  
56  
57  
58  
59  
60

The other major aspect of this study is estimating the impact of common covariates on the relative excess mortality risk. Being diagnosed at a later age was significantly associated with an increased relative excess mortality risk. A long-term follow-up after diagnosis and curative treatment were significantly associated with the most protective relative excess mortality risk.

This study is particularly relevant when considering the 5-year relative survival of non-hepatic cancers in Canada. For example, studies by Coleman *et al.*<sup>33,38</sup> estimated the 5-year relative survival for breast cancer in Ontario from 1990-1999 to be 81.6% (95% CI: 80.9, 82.3%). For other cancers such as colon, rectum, and colorectal, the 5-year relative survival in Ontario ranged from 51.0% to 59.1%.<sup>38,40</sup> Routine analysis and documentation of cancer survival is necessary to identify successes and failures of medical intervention and to expose disparities in care that can be addressed and these interventions continue to evolve.

## Limitations

There are some limitations in the data used in this study. Data from the OCR only included cancer staging sub-categorization from 2004 onwards; however, more complete cancer staging is available only in recent years. Therefore we did not include cancer staging in this study. This is an important limitation as successful treatment of HCC is dependent on the stage at which treatment is initiated.<sup>29,41</sup> Additionally, behavioural factors that impact disease course and treatment decisions<sup>3,42</sup> such as alcohol use and body-mass index were not accounted for.<sup>3,39</sup> Finally, small sample size may lead to unstable survival estimates for the age at diagnosis group  $\geq 70$  years. We performed a sensitivity analysis to estimate relative survival, merging age at diagnosis 70-79 and  $\geq 80$  years; however, there were no significant differences from the initial results (see Appendix Table A3).

## Conclusion

The results of this study show that while survival has improved, the prognosis for HCC remains poor. Due to the expected increase in HCC cases in the coming years and the high cost of care, investments may be best directed toward early detection through screening and surveillance efforts. The modest improvement seen may be accounted for by treatment of disease detected early in its course. Indeed, significant advances in therapeutic interventions such as radiofrequency ablation, liver transplant, and small molecule tumour inhibitors (sorafenib) is also likely contributing to improved outcomes amongst HCC patients. In an approaching era of safe, highly effective interferon-free directly acting antiviral therapies and a treatment time that may reduce with tolerable side effects, many barriers to treatment of hepatitis C, a major cause of the increasing incidence of HCC, will likely fall. With the perspective of more effective antiviral therapies, the potential of

1  
2  
3 future therapeutic strategies to prevent progression of liver disease and its associated health and  
4  
5 economic burden is considerable.  
6  
7  
8  
9  
10  
11  
12  
13  
14  
15  
16  
17  
18  
19  
20  
21  
22  
23  
24  
25  
26  
27  
28  
29  
30  
31  
32  
33  
34  
35  
36  
37  
38  
39  
40  
41  
42  
43  
44  
45  
46  
47  
48  
49  
50  
51  
52  
53  
54  
55  
56  
57  
58  
59  
60

Confidential

## References

1. Ferlay J, Shin HR, Bray F, et al. Estimates of worldwide burden of cancer in 2008: GLOBOCAN 2008. *Int J Cancer* 2010;127:2893-917.
2. Pocobelli G, Cook LS, Brant R, et al. Hepatocellular carcinoma incidence trends in Canada: analysis by birth cohort and period of diagnosis. *Liver Int* 2008;28:1272-9.
3. Dyer Z, Peltekian K, van Zanten SV. Review article: the changing epidemiology of hepatocellular carcinoma in Canada. *Aliment Pharmacol Ther* 2005;22:17-22.
4. Canadian Cancer Society's Advisory Committee on Cancer Statistics. *Canadian Cancer Statistics 2013*. Toronto, ON: Canadian Cancer Society; 2013. Available at: <http://www.cancer.ca/~media/cancer.ca/CW/cancer%20information/cancer%20101/Canadian%20cancer%20statistics/canadian-cancer-statistics-2013-EN.pdf>. Accessed August 9, 2013.
5. El-Serag HB, Mason AC, Key C. Trends in survival of patients with hepatocellular carcinoma between 1977 and 1996 in the United States. *Hepatology* 2001;33:62-5.
6. Cabibbo G, Enea M, Attanasio M, et al. A meta-analysis of survival rates of untreated patients in randomized clinical trials of hepatocellular carcinoma. *Hepatology* 2010;51:1274-83.
7. El-Serag HB. Hepatocellular carcinoma. *N Engl J Med* 2011;365:1118-27.
8. Livraghi T, Meloni F, Di Stasi M, et al. Sustained complete response and complications rates after radiofrequency ablation of very early hepatocellular carcinoma in cirrhosis: Is resection still the treatment of choice? *Hepatology* 2008;47:82-9.
9. El-Serag HB, Marrero JA, Rudolph L, et al. Diagnosis and treatment of hepatocellular carcinoma. *Gastroenterology* 2008;134:1752-63.
10. Chen MS, Li JQ, Zheng Y, et al. A prospective randomized trial comparing percutaneous local ablative therapy and partial hepatectomy for small hepatocellular carcinoma. *Ann Surg* 2006;243:321-8.
11. Bolondi L, Sofia S, Siringo S, et al. Surveillance programme of cirrhotic patients for early diagnosis and treatment of hepatocellular carcinoma: a cost effectiveness analysis. *Gut* 2001;48:251-9.
12. Zhang BH, Yang BH, Tang ZY. Randomized controlled trial of screening for hepatocellular carcinoma. *J Cancer Res Clin Oncol* 2004;130:417-22.
13. Trevisani F, De NS, Rapaccini G, et al. Semiannual and annual surveillance of cirrhotic patients for hepatocellular carcinoma: effects on cancer stage and patient survival (Italian experience). *Am J Gastroenterol* 2002;97:734-44.
14. Sangiovanni A, Del Ninno E, Fasani P, et al. Increased survival of cirrhotic patients with a hepatocellular carcinoma detected during surveillance. *Gastroenterology* 2004;126:1005-14.

15. Yuen MF, Cheng CC, Lauder IJ, et al. Early detection of hepatocellular carcinoma increases the chance of treatment: Hong Kong experience. *Hepatology* 2000;31:330-5.
16. Wong LL, Limm WM, Severino R, et al. Improved survival with screening for hepatocellular carcinoma. *Liver Transpl* 2000;6:320-5.
17. Oka H, Kurioka N, Kim K, et al. Prospective study of early detection of hepatocellular carcinoma in patients with cirrhosis. *Hepatology* 1990;12:680-7.
18. Santi V, Trevisani F, Gramenzi A, et al. Semiannual surveillance is superior to annual surveillance for the detection of early hepatocellular carcinoma and patient survival. *J Hepatol* 2010;53:291-7.
19. Black RJ, Swaminathan R. Statistical methods for the analysis of cancer survival data. *IARC Sci Publ* 1998:3-7.
20. Compton CC, Byrd DR, Garcia-Aguilar J, et al. *AJCC Cancer Staging Atlas, 2nd ed. A Companion to the Seventh Editions of the AJCC Cancer Staging Manual and Handbook.* American Joint Committee on Cancer 2012:23-31.
21. Dickman PW, Sloggett A, Hills M, et al. Regression models for relative survival. *Stat Med* 2004;23:51-64.
22. Hakulinen T, Tenkanen L. Regression analysis of relative survival rates. *J R Stat Soc Ser C Appl Stat* 1987;36:309-17.
23. Perme MP, Stare J, Esteve J. On estimation in relative survival. *Biometrics* 2012;68:113-20.
24. Rutter CM, Johnson EA, Feuer EJ, et al. Secular trends in colon and rectal cancer relative survival. *J Natl Cancer Inst* 2013;105:1806-13.
25. Hall S, Schulze K, Groome P, et al. Using cancer registry data for survival studies: the example of the Ontario Cancer Registry. *J Clin Epidemiol* 2006;59:67-76.
26. Clarke EA, Marrett LD, Kreiger N. Cancer registration in Ontario: a computer approach. *IARC Sci Publ* 1991:246-57.
27. Alibhai SM, Leach M, Tomlinson G, et al. 30-day mortality and major complications after radical prostatectomy: influence of age and comorbidity. *J Natl Cancer Inst* 2005;97:1525-32.
28. Canadian Institute for Health Information. Available at: <http://www.cihi.ca>. Accessed Oct 13, 2011.
29. Jembere N, Campitelli MA, Sherman M, et al. Influence of socioeconomic status on survival of hepatocellular carcinoma in the ontario population; a population-based study, 1990-2009. *PLoS One* 2012;7:e40917.
30. Thein HH, Isaranuwatthai W, Campitelli MA, et al. Health care costs associated with hepatocellular carcinoma: A population-based study. *Hepatology* 2013;58:1375-84.

- 1
- 2
- 3 31. Charlson ME, Pompei P, Ales KL, et al. A new method of classifying prognostic comorbidity
- 4 in longitudinal studies: development and validation. *J Chronic Dis* 1987;40:373-83.
- 5
- 6 32. Deyo RA, Cherkin DC, Ciol MA. Adapting a clinical comorbidity index for use with ICD-9-
- 7 CM administrative databases. *J Clin Epidemiol* 1992;45:613-9.
- 8
- 9 33. Canadian Human Mortality Database. Available at:
- 10 <http://www.bdlc.umontreal.ca/CHMD/prov/ont/ont.htm>. Accessed April 2, 2014.
- 11
- 12 34. Ederer F, Axtell LM, Cutler SJ. The relative survival rate: a statistical methodology. *Natl*
- 13 *Cancer Inst Monogr* 1961;6:101-21.
- 14
- 15 35. Brenner H, Gefeller O, Hakulinen T. Period analysis for 'up-to-date' cancer survival data:
- 16 theory, empirical evaluation, computational realisation and applications. *Eur J Cancer*
- 17 2004;40:326-35.
- 18
- 19 36. Brenner H, Hakulinen T. Period versus cohort modeling of up-to-date cancer survival. *Int J*
- 20 *Cancer* 2008;122:898-904.
- 21
- 22 37. Swaminathan R, Brenner H. Statistical methods for cancer survival analysis. *IARC Sci Publ*
- 23 2011:7-13.
- 24
- 25 38. Coleman MP, Forman D, Bryant H, et al. Cancer survival in Australia, Canada, Denmark,
- 26 Norway, Sweden, and the UK, 1995-2007 (the International Cancer Benchmarking
- 27 Partnership): an analysis of population-based cancer registry data. *Lancet* 2011;377:127-38.
- 28
- 29 39. Ellison LF. Estimating relative survival for cancer: An analysis of bias introduced by outdated
- 30 life tables. *Health Rep* 2014;25:13-9.
- 31
- 32 40. Coleman MP, Quaresma M, Berrino F, et al. Cancer survival in five continents: a worldwide
- 33 population-based study (CONCORD). *Lancet Oncol* 2008;9:730-56.
- 34
- 35 41. Lin S, Hoffmann K, Schemmer P. Treatment of hepatocellular carcinoma: a systematic review.
- 36 *Liver Cancer* 2012;1:144-58.
- 37
- 38 42. Sanyal AJ, Yoon SK, Lencioni R. The etiology of hepatocellular carcinoma and consequences
- 39 for treatment. *Oncologist* 2010;15 Suppl 4:14-22.
- 40
- 41
- 42
- 43
- 44
- 45
- 46
- 47
- 48
- 49
- 50
- 51
- 52
- 53
- 54
- 55
- 56
- 57
- 58
- 59
- 60



Table 1. Number of hepatocellular carcinoma cases, standardized-mortality-ratios, and period percentage changes by sex, year of diagnosis, and age at diagnosis

| Year of Diagnosis          | Female               |                                   | Male                 |                                  |
|----------------------------|----------------------|-----------------------------------|----------------------|----------------------------------|
|                            | N (%)                | SMR (95% CI)<br>[% change]        | N (%)                | SMR (95% CI)<br>[% change]       |
| <b>Total</b>               | <b>1233 (100.00)</b> |                                   | <b>4412 (100.00)</b> |                                  |
| 1990-1994                  | 177 (14.36)          | 29.30 (18.69, 39.90)<br>[N/A]     | 541 (12.26)          | 19.59 (10.91, 28.26)<br>[N/A]    |
| 1995-1999                  | 229 (18.57)          | 19.75 (11.04, 28.46)<br>[-32.59]  | 820 (18.59)          | 15.39 (7.70, 23.08)<br>[-21.42]  |
| 2000-2004                  | 352 (28.55)          | 18.09 (9.75, 26.42)<br>[-8.43]    | 1229 (27.86)         | 14.95 (7.37, 22.53)<br>[-2.87]   |
| 2005-2009                  | 475 (38.52)          | 16.61 (8.62, 24.60)<br>[-8.15]    | 1822 (41.30)         | 14.34 (6.92, 21.76)<br>[-4.07]   |
| <b>Age at Diagnosis</b>    |                      |                                   |                      |                                  |
| <b>&lt;60 years, N (%)</b> | <b>320 (100.00)</b>  |                                   | <b>1580 (100.00)</b> |                                  |
| 1990-1994                  | 62 (19.38)           | 126.84 (104.77, 148.92)<br>[N/A]  | 167 (10.57)          | 92.62 (73.76, 111.48)<br>[N/A]   |
| 1995-1999                  | 56 (17.50)           | 92.1 (73.29, 110.91)<br>[-27.39]  | 262 (16.58)          | 76.59 (59.44, 93.74)<br>[-17.31] |
| 2000-2004                  | 77 (24.06)           | 110.51 (89.91, 131.11)<br>[19.99] | 468 (29.62)          | 58.07 (43.13, 73.00)<br>[-24.18] |
| 2005-2009                  | 125 (39.06)          | 86.84 (68.57, 105.10)<br>[-21.42] | 683 (43.23)          | 63.95 (48.27, 79.62)<br>[10.12]  |
| <b>60-69 years, N (%)</b>  | <b>345 (100.00)</b>  |                                   | <b>1307 (100.00)</b> |                                  |
| 1990-1994                  | 57 (16.52)           | 41.67 (29.02, 54.32)<br>[N/A]     | 213 (16.30)          | 22.13 (12.91, 31.35)<br>[N/A]    |
| 1995-1999                  | 73 (21.16)           | 29.62 (18.95, 40.29)<br>[-28.92]  | 266 (20.35)          | 23.35 (13.88, 32.82)<br>[5.50]   |
| 2000-2004                  | 102 (29.57)          | 36.08 (24.31, 47.85)<br>[21.81]   | 349 (26.70)          | 23.32 (13.85, 32.78)<br>[-0.11]  |
| 2005-2009                  | 113 (32.75)          | 37.76 (25.72, 49.80)<br>[4.66]    | 479 (36.65)          | 23.20 (13.76, 32.64)<br>[-0.50]  |
| <b>70-79 years, N (%)</b>  | <b>399 (100.00)</b>  |                                   | <b>1196 (100.00)</b> |                                  |
| 1990-1994                  | 38 (9.52)            | 26.32 (16.27, 36.38)<br>[N/A]     | 133 (11.12)          | 11.78 (5.05, 18.51)<br>[N/A]     |

1  
2  
3  
4  
5  
6  
7  
8  
9  
10  
11  
12  
13  
14  
15  
16  
17  
18  
19  
20  
21  
22  
23  
24  
25  
26  
27  
28  
29  
30  
31  
32  
33  
34  
35  
36  
37  
38  
39  
40  
41  
42  
43  
44  
45  
46  
47  
48  
49  
50  
51  
52  
53  
54  
55  
56  
57  
58  
59  
60

|                         |                     |                      |                     |                     |
|-------------------------|---------------------|----------------------|---------------------|---------------------|
| 1995-1999               | 79 (19.80)          | 19.54 (10.87, 28.20) | 244 (20.40)         | 9.36 (3.36, 15.36)  |
|                         |                     | [-25.78]             |                     | [-20.56]            |
| 2000-2004               | 132 (33.08)         | 16.83 (8.79, 24.87)  | 334 (27.93)         | 9.25 (3.29, 15.21)  |
|                         |                     | [-13.88]             |                     | [-1.16]             |
| 2005-2009               | 150 (37.59)         | 16.38 (8.45, 24.31)  | 485 (40.55)         | 10.38 (4.06, 16.69) |
|                         |                     | [-2.66]              |                     | [12.16]             |
| <b>≥80 years, N (%)</b> | <b>169 (100.00)</b> |                      | <b>329 (100.00)</b> |                     |
| 1990-1994               | 20 (11.83)          | 8.71 (2.92, 14.49)   | 28 (8.51)           | 6.99 (1.81, 12.18)  |
|                         |                     | [N/A]                |                     | [N/A]               |
| 1995-1999               | 21 (12.43)          | 5.62 (0.98, 10.27)   | 48 (14.59)          | 4.71 (0.46, 8.96)   |
|                         |                     | [-35.43]             |                     | [-32.66]            |
| 2000-2004               | 41 (24.26)          | 5.83 (1.10, 10.56)   | 78 (23.71)          | 5.19 (0.73, 9.66)   |
|                         |                     | [3.63]               |                     | [10.28]             |
| 2005-2009               | 87 (51.48)          | 7.59 (2.19, 12.99)   | 175 (53.19)         | 4.75 (0.48, 9.02)   |
|                         |                     | [30.31]              |                     | [-8.53]             |

---

SMR, standardized mortality ratio; CI, confidence intervals; N/A, not applicable.

Table 2. Relative survival after diagnosis of hepatocellular carcinoma by sex, year of diagnosis, and age at diagnosis

| Year of Diagnosis      | Age at Diagnosis (years) | Cases (N) | Events (N) | 1-year Relative Survival % (95% CI) | 5-year Relative Survival % (95% CI) |
|------------------------|--------------------------|-----------|------------|-------------------------------------|-------------------------------------|
| <b>Cohort Analysis</b> |                          |           |            |                                     |                                     |
| <b>Female</b>          |                          |           |            |                                     |                                     |
| 1990-1994              | <60                      | 62        | 48         | 38.27 (27.09, 49.35)                | 17.44 (9.45, 27.48)                 |
|                        | 60-69                    | 57        | 49         | 28.97 (18.74, 40.01)                | 11.01 (4.92, 19.95)                 |
|                        | 70-79                    | 38        | 37         | 14.42 (7.23, 24.02)                 | 0.43 (0.01, 4.34)*                  |
|                        | ≥80                      | 20        | 20         | 7.46 (2.08, 17.71)                  | 0.09 (0.00, 0.99)                   |
| 1995-1999              | <60                      | 56        | 38         | 49.19 (36.10, 61.04)                | 25.92 (15.10, 38.17)                |
|                        | 60-69                    | 73        | 56         | 54.51 (43.21, 64.52)                | 19.28 (11.28, 28.99)                |
|                        | 70-79                    | 79        | 72         | 22.54 (15.33, 30.64)                | 6.14 (2.31, 12.78)                  |
|                        | ≥80                      | 21        | 19         | 25.32 (11.97, 41.55)                | 10.12 (1.89, 29.03)                 |
| 2000-2004              | <60                      | 77        | 56         | 51.77 (40.65, 61.79)                | 20.44 (11.90, 30.62)                |
|                        | 60-69                    | 102       | 80         | 42.00 (32.85, 50.89)                | 17.61 (10.75, 25.94)                |
|                        | 70-79                    | 132       | 119        | 47.34 (38.54, 55.69)                | 9.78 (5.21, 16.16)                  |
|                        | ≥80                      | 41        | 37         | 41.72 (27.49, 55.76)                | 12.29 (3.48, 28.69)                 |
| 2005-2009              | <60                      | 125       | 65         | 70.93 (62.18, 78.03)                | 27.69 (18.27, 37.93)                |
|                        | 60-69                    | 113       | 81         | 54.27 (44.83, 62.80)                | 19.36 (11.87, 28.29)                |
|                        | 70-79                    | 150       | 120        | 51.52 (43.41, 59.08)                | 12.91 (7.38, 20.15)                 |
|                        | ≥80                      | 87        | 81         | 40.81 (30.38, 51.17)                | 4.85 (0.83, 15.62)                  |
| <b>Male</b>            |                          |           |            |                                     |                                     |
| 1990-1994              | <60                      | 167       | 142        | 31.81 (25.52, 38.27)                | 7.13 (3.84, 11.80)                  |
|                        | 60-69                    | 213       | 185        | 28.08 (23.00, 33.37)                | 10.56 (7.04, 14.93)                 |
|                        | 70-79                    | 133       | 125        | 21.03 (15.31, 27.41)                | 5.08 (2.11, 10.16)                  |
|                        | ≥80                      | 28        | 28         | 8.39 (2.24, 20.17)                  | 0.96 (0.02, 8.04) <sup>†</sup>      |
| 1995-1999              | <60                      | 262       | 204        | 35.82 (30.62, 41.05)                | 15.14 (11.14, 19.71)                |
|                        | 60-69                    | 266       | 223        | 34.53 (29.32, 39.80)                | 12.61 (8.90, 17.04)                 |
|                        | 70-79                    | 244       | 216        | 35.76 (30.33, 41.25)                | 10.77 (7.08, 15.41)                 |
|                        | ≥80                      | 48        | 44         | 14.63 (7.95, 23.42)                 | 7.88 (2.18, 19.94)                  |
| 2000-2004              | <60                      | 468       | 296        | 52.47 (48.07, 56.67)                | 27.53 (23.33, 31.89)                |
|                        | 60-69                    | 349       | 278        | 43.98 (38.92, 48.94)                | 17.33 (13.40, 21.71)                |
|                        | 70-79                    | 334       | 290        | 47.59 (42.37, 52.67)                | 13.31 (9.62, 17.67)                 |
|                        | ≥80                      | 78        | 75         | 30.54 (21.05, 40.79)                | 3.67 (0.72, 11.66)                  |
| 2005-2009              | <60                      | 683       | 439        | 56.94 (53.20, 60.50)                | 25.13 (21.39, 29.04)                |
|                        | 60-69                    | 479       | 339        | 52.68 (48.26, 56.91)                | 22.85 (18.76, 27.22)                |

1  
2  
3  
4  
5  
6  
7  
8  
9  
10  
11  
12  
13  
14  
15  
16  
17  
18  
19  
20  
21  
22  
23  
24  
25  
26  
27  
28  
29  
30  
31  
32  
33  
34  
35  
36  
37  
38  
39  
40  
41  
42  
43  
44  
45  
46  
47  
48  
49  
50  
51  
52  
53  
54  
55  
56  
57  
58  
59  
60

|       |     |     |                      |                      |
|-------|-----|-----|----------------------|----------------------|
| 70-79 | 485 | 390 | 55.90 (51.34, 60.24) | 15.34 (11.66, 19.55) |
| ≥80   | 175 | 159 | 39.85 (32.52, 47.22) | 12.13 (6.23, 20.73)  |

---

**Period Analysis: Estimates of 5-Year Relative Survival Available in 2005-2009**

---

|        |       |  |                      |                      |
|--------|-------|--|----------------------|----------------------|
| Female | <60   |  | 70.93 (62.18, 78.03) | 26.57 (16.77, 37.43) |
|        | 60-69 |  | 54.27 (44.83, 62.80) | 19.87 (12.42, 28.66) |
|        | 70-79 |  | 51.52 (43.41, 59.08) | 12.20 (6.68, 19.61)  |
|        | ≥80   |  | 40.81 (30.38, 51.17) | 8.21 (2.01, 21.31)   |
| Male   | <60   |  | 56.94 (53.20, 60.50) | 27.59 (23.77, 31.53) |
|        | 60-69 |  | 52.68 (48.26, 56.91) | 21.75 (17.60, 26.24) |
|        | 70-79 |  | 55.9 (51.34, 60.24)  | 13.91 (10.24, 18.19) |
|        | ≥80   |  | 39.85 (32.52, 47.22) | 8.86 (3.39, 18.43)   |

---

CI, confidence intervals. \*4-year relative survival. †2-year relative survival.

Confidential

Table 3. Generalized linear model using Poisson error structure to model relative excess hazard ratio for mortality after diagnosis of hepatocellular carcinoma using expected hazard from Ontario life tables, 1990-2009: Model 1

| Parameters                         | Level                     | $\beta$<br>coefficient | SE        | Relative Excess Hazard Ratio<br>(95% CI) | P-value |
|------------------------------------|---------------------------|------------------------|-----------|------------------------------------------|---------|
| Intercept                          |                           | 0.545                  | 0.088     | 1.724 (1.451, 2.047)                     | <0.001  |
| Year of diagnosis                  | 1990-1994                 | Reference              | Reference | Reference                                |         |
|                                    | 1995-1999                 | -0.239                 | 0.055     | 0.787 (0.706, 0.877)                     | <0.001  |
|                                    | 2000-2004                 | -0.314                 | 0.053     | 0.730 (0.659, 0.810)                     | <0.001  |
|                                    | 2005-2009                 | -0.258                 | 0.052     | 0.773 (0.698, 0.855)                     | <0.001  |
| Follow-up after<br>diagnosis       | 1 year                    | Reference              | Reference | Reference                                |         |
|                                    | 2 years                   | -0.521                 | 0.043     | 0.594 (0.546, 0.646)                     | <0.001  |
|                                    | 3 years                   | -0.669                 | 0.060     | 0.512 (0.455, 0.576)                     | <0.001  |
|                                    | 4 years                   | -0.615                 | 0.074     | 0.541 (0.468, 0.625)                     | <0.001  |
|                                    | 5 years                   | -1.055                 | 0.115     | 0.348 (0.278, 0.437)                     | <0.001  |
| Age at diagnosis                   | <60 years                 | Reference              | Reference | Reference                                |         |
|                                    | 60-69 years               | -0.041                 | 0.041     | 0.960 (0.886, 1.041)                     | 0.323   |
|                                    | 70-79 years               | -0.096                 | 0.042     | 0.909 (0.837, 0.986)                     | 0.022   |
|                                    | $\geq 80$ years           | 0.020                  | 0.062     | 1.020 (0.903, 1.152)                     | 0.754   |
| Gender                             | Female                    | Reference              | Reference | Reference                                |         |
|                                    | Male                      | 0.030                  | 0.038     | 1.031 (0.956, 1.111)                     | 0.433   |
| Charlson-Deyo<br>Comorbidity Index | 0                         | Reference              | Reference | Reference                                |         |
|                                    | 1                         | -0.234                 | 0.044     | 0.791 (0.726, 0.863)                     | <0.001  |
|                                    | 2                         | -0.595                 | 0.054     | 0.551 (0.496, 0.612)                     | <0.001  |
|                                    | $\geq 3$                  | -0.692                 | 0.059     | 0.500 (0.446, 0.562)                     | <0.001  |
|                                    | No hospitalization record | -0.649                 | 0.043     | 0.523 (0.480, 0.568)                     | <0.001  |
| HCC treatments                     |                           | Reference              | Reference | Reference                                |         |
|                                    | Curative                  | -1.474                 | 0.058     | 0.229 (0.204, 0.257)                     | <0.001  |
|                                    | Non-curative              | -0.410                 | 0.049     | 0.664 (0.603, 0.731)                     | <0.001  |
|                                    | Palliative care           | 0.331                  | 0.060     | 1.393 (1.238, 1.566)                     | <0.001  |
|                                    | No treatment              | 0.378                  | 0.069     | 1.459 (1.276, 1.670)                     | <0.001  |

Model 1 (overall p-value): year of diagnosis (p<0.001); follow-up after diagnosis (p<0.001); age at diagnosis (p=0.08); Charlson-Deyo Comorbidity Index (p<0.001).

Table 4. Generalized linear model using Poisson error structure to model relative excess hazard ratio for mortality after diagnosis of hepatocellular carcinoma using expected hazard from Ontario life tables, 1990-2009; Model 2: Interactions between age at diagnosis and gender, year of diagnosis and palliative care are used in the model

| Parameters                         | Level                     | $\beta$<br>coefficient | SE        | Relative Excess Hazard<br>Ratio (95% CI) | P-value |
|------------------------------------|---------------------------|------------------------|-----------|------------------------------------------|---------|
| Intercept                          |                           | 0.445                  | 0.115     | 1.561 (1.246, 1.955)                     | <0.001  |
| Year of diagnosis                  | 1990-1994                 | Reference              | Reference | Reference                                |         |
|                                    | 1995-1999                 | -0.281                 | 0.099     | 0.755 (0.622, 0.917)                     | 0.005   |
|                                    | 2000-2004                 | -0.322                 | 0.093     | 0.724 (0.603, 0.870)                     | 0.001   |
|                                    | 2005-2009                 | -0.312                 | 0.089     | 0.732 (0.615, 0.871)                     | <0.001  |
| Follow-up after diagnosis          | 1 year                    | Reference              | Reference | Reference                                |         |
|                                    | 2 years                   | -0.509                 | 0.043     | 0.601 (0.552, 0.654)                     | <0.001  |
|                                    | 3 years                   | -0.656                 | 0.060     | 0.519 (0.461, 0.584)                     | <0.001  |
|                                    | 4 years                   | -0.596                 | 0.074     | 0.551 (0.477, 0.637)                     | <0.001  |
|                                    | 5 years                   | -1.025                 | 0.115     | 0.359 (0.286, 0.450)                     | <0.001  |
| Age at diagnosis                   | <60 years                 | Reference              | Reference | Reference                                |         |
|                                    | 60-69 years               | -0.034                 | 0.129     | 0.967 (0.750, 1.246)                     | 0.794   |
|                                    | 70-79 years               | 0.298                  | 0.136     | 1.347 (1.032, 1.757)                     | 0.028   |
|                                    | $\geq 80$ years           | 0.530                  | 0.192     | 1.698 (1.165, 2.475)                     | 0.006   |
| Gender                             | Female                    | Reference              | Reference | Reference                                |         |
|                                    | Male                      | 0.116                  | 0.077     | 1.123 (0.965, 1.307)                     | 0.133   |
| Charlson-Deyo<br>Comorbidity Index | 0                         | Reference              | Reference | Reference                                |         |
|                                    | 1                         | -0.239                 | 0.044     | 0.788 (0.722, 0.859)                     | <0.001  |
|                                    | 2                         | -0.604                 | 0.054     | 0.547 (0.492, 0.607)                     | <0.001  |
|                                    | $\geq 3$                  | -0.701                 | 0.060     | 0.496 (0.442, 0.558)                     | <0.001  |
|                                    | No hospitalization record | -0.654                 | 0.043     | 0.520 (0.478, 0.566)                     | <0.001  |
| HCC treatments                     | No specific treatment     | Reference              | Reference | Reference                                |         |
|                                    | Curative                  | -1.500                 | 0.058     | 0.223 (0.199, 0.250)                     | <0.001  |
|                                    | Non-curative              | -0.430                 | 0.050     | 0.651 (0.590, 0.717)                     | <0.001  |
|                                    | Palliative care           | 0.528                  | 0.073     | 1.696 (1.470, 1.957)                     | <0.001  |
|                                    | No treatment              | 0.338                  | 0.070     | 1.403 (1.223, 1.608)                     | <0.001  |
| Interactions:                      |                           |                        |           |                                          |         |
| Age at diagnosis*gender            | Female/<60 years          | Reference              | Reference | Reference                                |         |
|                                    | Male                      |                        |           |                                          |         |
|                                    | 60-69 years               | 0.0682                 | 0.117     | 1.071 (0.851, 1.347)                     | 0.560   |

|                                    |                              |             |           |           |                      |        |
|------------------------------------|------------------------------|-------------|-----------|-----------|----------------------|--------|
|                                    |                              | 70-79 years | 0.130     | 0.126     | 1.139 (0.889, 1.458) | 0.304  |
|                                    |                              | ≥80 years   | 0.654     | 0.186     | 1.923 (1.335, 2.772) | 0.001  |
| Age at diagnosis*year of diagnosis | 1990-1994/<60 years          | Reference   | Reference | Reference |                      |        |
|                                    | 1995-1999                    | 60-69 years | -0.190    | 0.128     | 0.827 (0.644, 1.062) | 0.137  |
|                                    | 2000-2004                    | 60-69 years | -0.139    | 0.126     | 0.870 (0.680, 1.114) | 0.270  |
|                                    | 2005-2009                    | 60-69 years | -0.121    | 0.125     | 0.887 (0.694, 1.133) | 0.336  |
|                                    | 1995-1999                    | 70-79 years | 0.014     | 0.127     | 1.014 (0.791, 1.299) | 0.913  |
|                                    | 2000-2004                    | 70-79 years | -0.193    | 0.121     | 0.825 (0.650, 1.046) | 0.111  |
|                                    | 2005-2009                    | 70-79 years | 0.018     | 0.123     | 1.018 (0.801, 1.295) | 0.882  |
|                                    | 1995-1999                    | ≥80 years   | 0.133     | 0.182     | 1.142 (0.799, 1.632) | 0.465  |
|                                    | 2000-2004                    | ≥80 years   | -0.243    | 0.165     | 0.784 (0.568, 1.084) | 0.141  |
|                                    | 2005-2009                    | ≥80 years   | -0.288    | 0.158     | 0.750 (0.550, 1.023) | 0.069  |
| Age at diagnosis*palliative care   | No palliative care/<60 years | Reference   | Reference | Reference |                      |        |
|                                    | Palliative care              | 60-69 years | 0.136     | 0.145     | 1.146 (0.863, 1.523) | 0.347  |
|                                    |                              | 70-79 years | 0.515     | 0.155     | 1.674 (1.236, 2.267) | 0.001  |
|                                    |                              | ≥80 years   | 0.822     | 0.220     | 2.275 (1.48, 3.499)  | <0.001 |

Model 2 (overall p-value): year of diagnosis (p=0.004); follow-up after diagnosis (p<0.001); age at diagnosis (p=0.004); Charlson-Deyo Comorbidity Index (p<0.001). Interactions between age at diagnosis and gender (p=0.009), year of diagnosis (p=0.003) and palliative care (p<0.001). Interactions between age at diagnosis and follow-up after diagnosis, Charlson-Deyo Comorbidity Index, curative treatment, non-curative treatment and no treatment were not significant.

1  
2  
3  
4  
5  
6  
7  
8  
9  
10  
11  
12  
13  
14  
15  
16  
17  
18  
19  
20  
21  
22  
23  
24  
25  
26  
27  
28  
29  
30  
31  
32  
33  
34  
35  
36  
37  
38  
39  
40  
41  
42  
43  
44  
45  
46  
47  
48  
49  
50  
51  
52  
53  
54  
55  
56  
57  
58  
59  
60

**FIGURE LEGEND:**

Figure 1: Overall age-standardized 1- and 5-year relative survival trends (1995-2009) for hepatocellular carcinoma, Ontario

Figure 2: Age-standardized 1- and 5-year relative survival trends (1995-2009) for hepatocellular carcinoma by gender, Ontario

Figure 3: Age-standardized 5-year relative survival: period analysis vs. cohort analysis by gender and age at diagnosis

Confidential



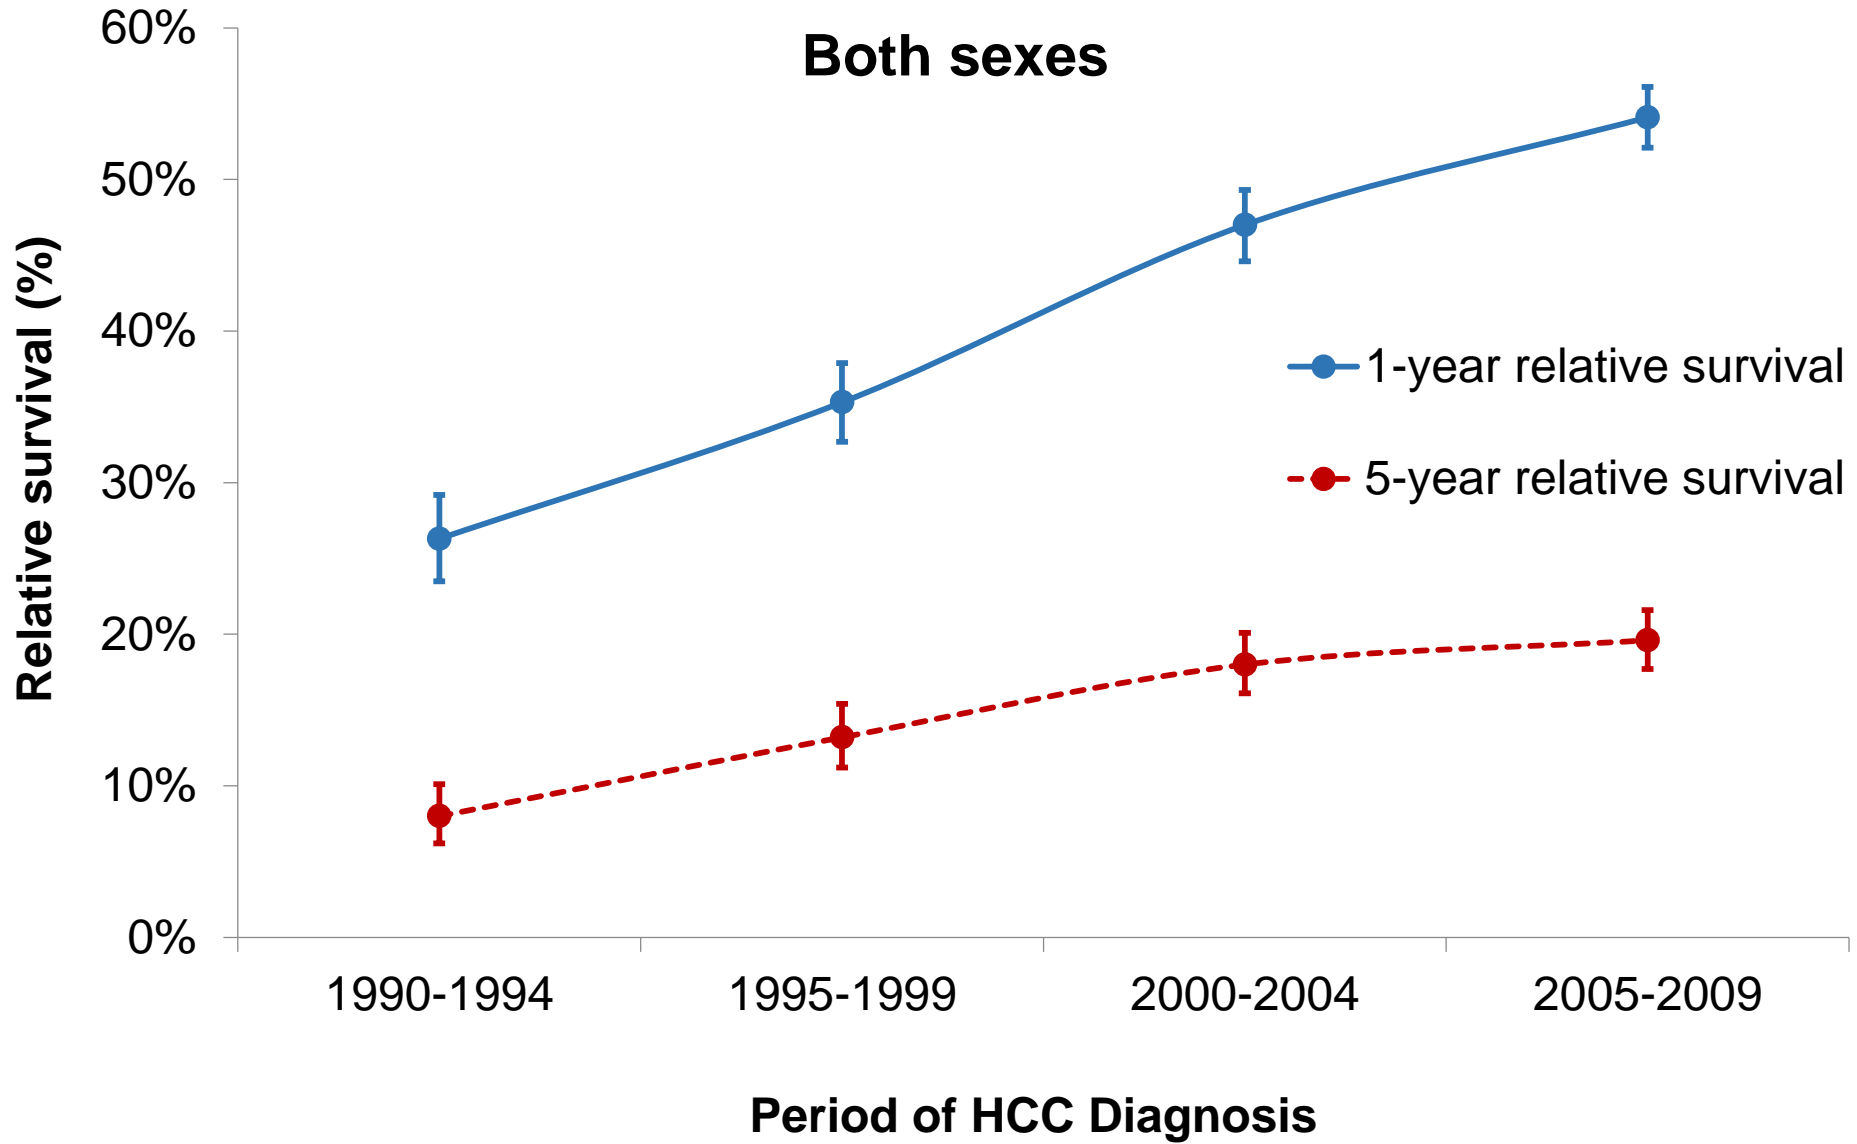

Figure 1.

1  
2  
3  
4  
5  
6  
7  
8  
9  
10  
11  
12  
13  
14  
15  
16  
17  
18  
19  
20  
21  
22  
23  
24  
25  
26  
27  
28  
29  
30  
31  
32  
33  
34  
35  
36  
37  
38  
39  
40  
41  
42  
43

1  
2  
3  
4  
5  
6  
7  
8  
9  
10  
11  
12  
13  
14  
15  
16  
17  
18  
19  
20  
21  
22  
23  
24  
25  
26  
27  
28  
29  
30  
31  
32  
33  
34  
35  
36  
37  
38  
39  
40  
41  
42  
43

### 1-year relative survival

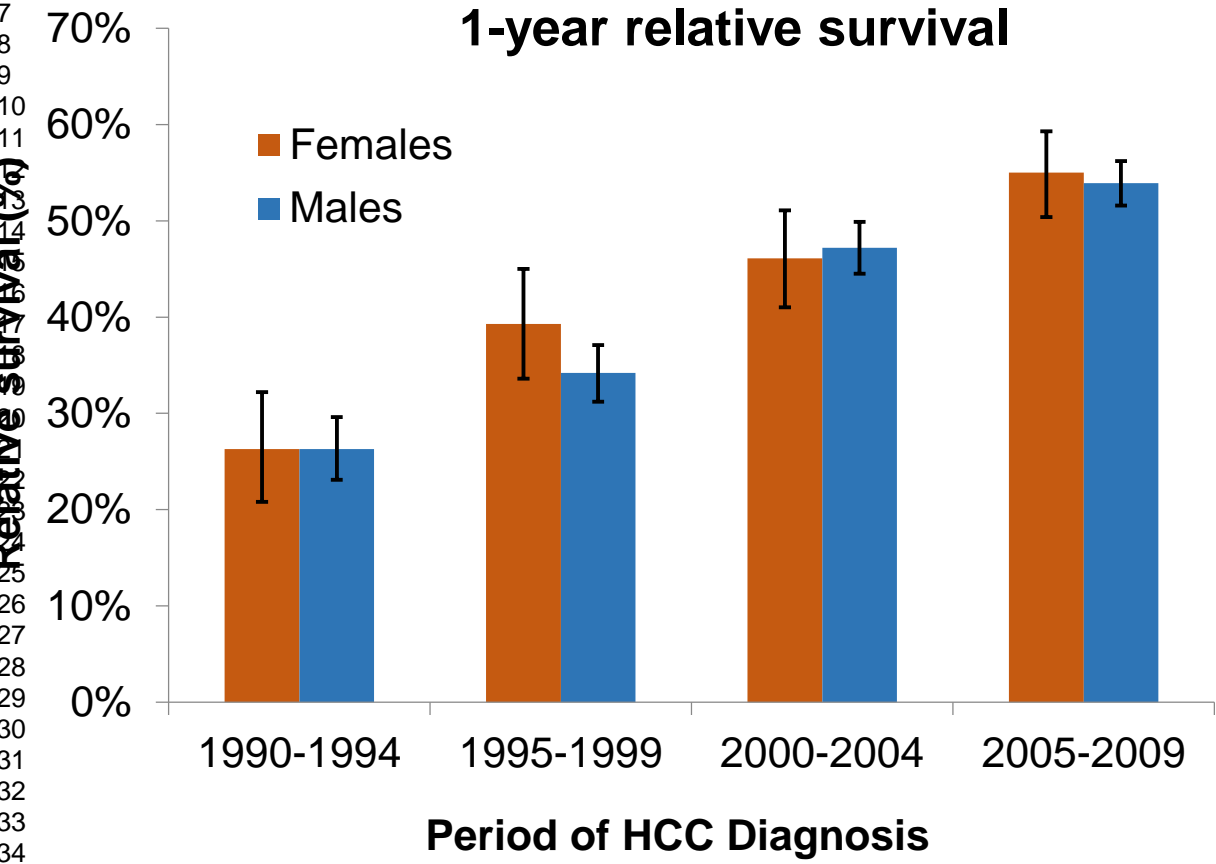

### 5-year relative survival

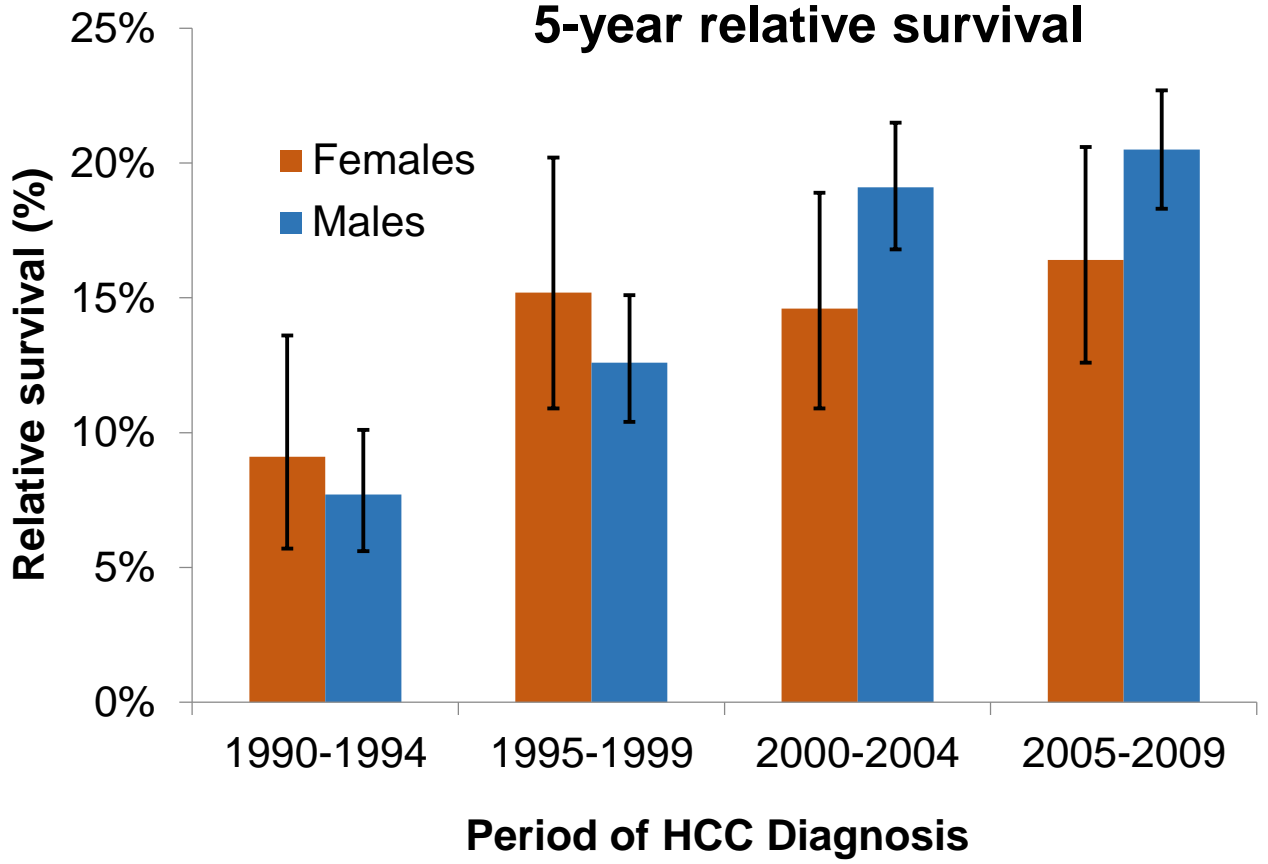

Figure 2.

1  
2  
3  
4  
5  
6  
7  
8  
9  
10  
11  
12  
13  
14  
15  
16  
17  
18  
19  
20  
21  
22  
23  
24  
25  
26  
27  
28  
29  
30  
31  
32  
33  
34  
35  
36  
37  
38  
39  
40  
41  
42  
43

### 5-year relative survival: Females, 2005-2009

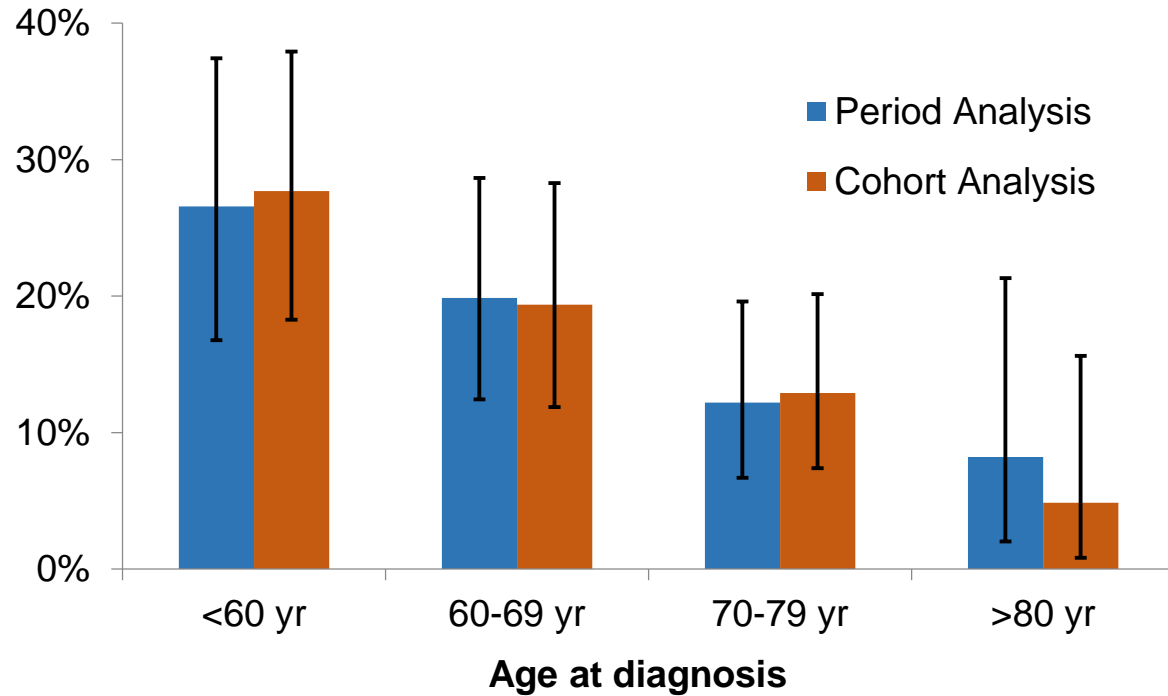

### 5-year relative survival: Males, 2005-2009

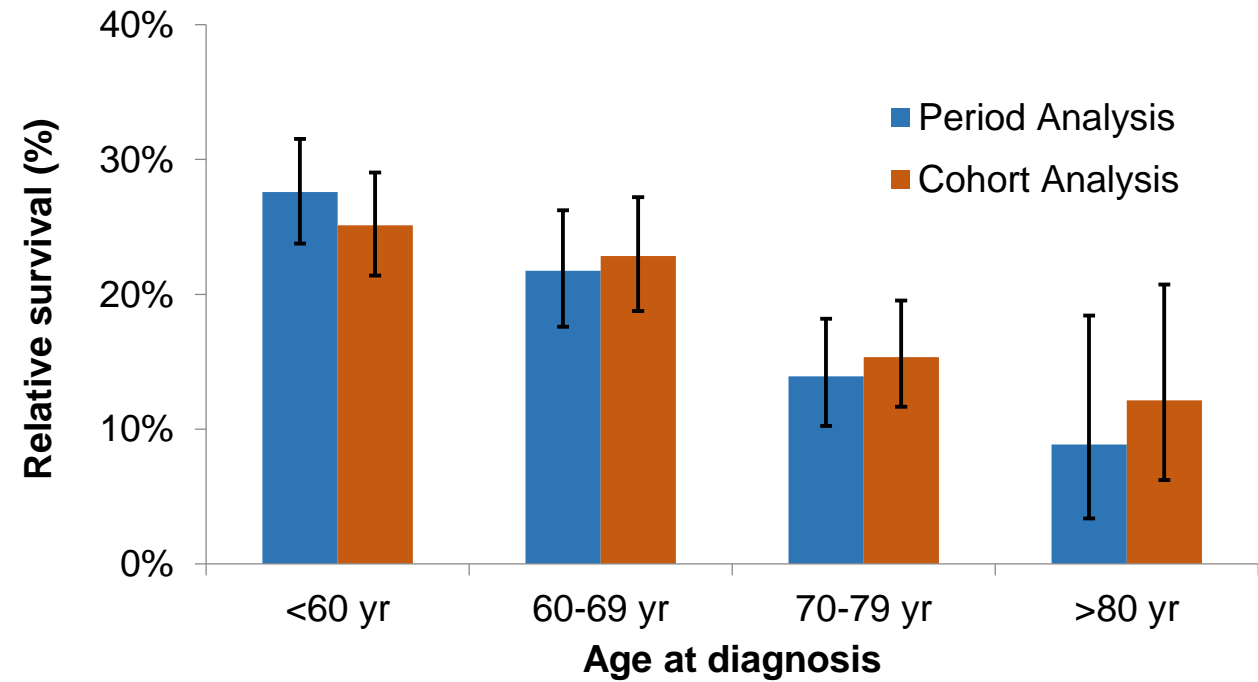

Figure 3.

## Appendix

Table A1. Treatment procedures for persons diagnosed with hepatocellular carcinoma

|                                                                                                                        | CCP code | CCI code   | OHIP code |
|------------------------------------------------------------------------------------------------------------------------|----------|------------|-----------|
| <i>Potentially curative therapy</i>                                                                                    |          |            |           |
| Local excision or destruction of lesion or tissue of liver                                                             | 62.1     |            |           |
| Partial hepatectomy                                                                                                    | 62.12    |            |           |
| Other destruction of lesion of liver                                                                                   | 62.19    |            |           |
| Lobectomy of liver                                                                                                     | 62.20    |            |           |
| Excision partial, liver using endoscopic (laparoscopic) approach                                                       |          | 10A87DA    |           |
| Excision partial, liver using open approach                                                                            |          | 10A87LA    |           |
| Excision partial, liver using ultrasonic aspirator device (for dissection) and open approach                           |          | 10A87LAAZ  |           |
| Liver excision-complete left/right lobectomy                                                                           |          |            | S267      |
| Liver excision-of lesion                                                                                               |          |            | S269      |
| Liver excision-hepatectomy left lateral segmental excision                                                             |          |            | S270      |
| Liver excision-extended right lobectomy                                                                                |          |            | S271      |
| Liver excision-partial lobectomy                                                                                       |          |            | S275      |
| Total hepatectomy                                                                                                      | 62.3     |            |           |
| Liver transplant                                                                                                       | 62.4     |            |           |
| Auxiliary liver transplant                                                                                             | 62.41    |            |           |
| Other transplant of liver                                                                                              | 62.49    |            |           |
| Transplant, liver of a deceased donor full size liver                                                                  |          | 10A85LAXXK |           |
| Transplant, liver of a deceased donor multi organ liver with intestine/pancreas/spleen/stomach (or any combination of) |          | 10A85VCXXK |           |
| Transplant, liver of a living donor split liver                                                                        |          | 10A85WLXXJ |           |
| Transplant, liver of a deceased donor split liver (or reduced paediatric-size liver)                                   |          | 10A85WLXXK |           |
| Living donor orthotopic liver transplantation recipient                                                                |          |            | S266      |
| Liver excision-liver transplant-recipient                                                                              |          |            | S294      |
| Digestive system-liver-repeat liver transplant                                                                         |          |            | S295      |
| Destruction, liver endoscopic (laparoscopic) approach using radiofrequency                                             |          | 10A59DAAW  |           |
| Destruction, liver percutaneous approach using radiofrequency                                                          |          | 10A59HAAW  |           |
| Destruction, liver open approach using radiofrequency                                                                  |          | 10A59LAAW  |           |
| Radiofrequency ablation                                                                                                |          |            | J069      |
| <i>Non-curative therapy</i>                                                                                            |          |            |           |
| Percutaneous ablation                                                                                                  |          |            |           |

1  
2  
3  
4  
5  
6  
7  
8  
9  
10  
11  
12  
13  
14  
15  
16  
17  
18  
19  
20  
21  
22  
23  
24  
25  
26  
27  
28  
29  
30  
31  
32  
33  
34  
35  
36  
37  
38  
39  
40  
41  
42  
43  
44  
45  
46  
47  
48  
49  
50  
51  
52  
53  
54  
55  
56  
57  
58  
59  
60

|                                                                                                                                                                                                                                                                                                                                                                      |           |
|----------------------------------------------------------------------------------------------------------------------------------------------------------------------------------------------------------------------------------------------------------------------------------------------------------------------------------------------------------------------|-----------|
| Destruction, liver endoscopic (abdominal) approach using cryoprobe                                                                                                                                                                                                                                                                                                   | 10A59DAAD |
| Destruction, liver endoscopic (abdominal) approach using laser                                                                                                                                                                                                                                                                                                       | 10A59DAAG |
| Destruction, liver endoscopic (abdominal) approach using device NEC                                                                                                                                                                                                                                                                                                  | 10A59DAGX |
| Destruction, liver endoscopic (abdominal) approach using chemical cautery agent (e.g. ethanol)                                                                                                                                                                                                                                                                       | 10A59DAX7 |
| Destruction, liver percutaneous approach using chemical cautery agent (e.g. ethanol)                                                                                                                                                                                                                                                                                 | 10A59HAX7 |
| Destruction, liver open approach using cryoprobe                                                                                                                                                                                                                                                                                                                     | 10A59LAAD |
| Destruction, liver open approach using laser                                                                                                                                                                                                                                                                                                                         | 10A59LAAG |
| Destruction, liver open approach using device NEC                                                                                                                                                                                                                                                                                                                    | 10A59LAGX |
| Destruction, liver open approach using chemical cautery agent (e.g. ethanol)                                                                                                                                                                                                                                                                                         | 10A59LAX7 |
| <b>Chemotherapy</b>                                                                                                                                                                                                                                                                                                                                                  |           |
| Diagnostic and therapeutic injection(s)/infusion(s) test dose (bleomycin&l-asparaginase once per patient per drug)                                                                                                                                                                                                                                                   | G075      |
| Diagnostic and therapeutic injection/infusion-intravenous chemotherapy- each additional injection to                                                                                                                                                                                                                                                                 | G281      |
| Single agent intravenous chemotherapy i.e. doxorubicin, daunorubicin, epirubicin, mitoxintrone, cisplatin or bleomycin (greater than 10 units per metre square)                                                                                                                                                                                                      | G339      |
| Taxol, rituximab, trastuzumab, bortezomib, docetaxel administration or multiple agent intravenous chemotherapy including at least one of either doxorubicin, daunorubicin, epirubicin, mitoxintrone, cisplatin or bleomycin (greater than 10 units per metre square)                                                                                                 | G345      |
| Special single agent chemotherapy utilizing either high-dose methotrexate with folinic acid rescue - methotrexate given in a dose of greater than 1 g/m2, high dose cisplatin greater than 75 mg/m2 given concurrently with hydration and osmotic diuresis, high dose cytosine, arabinoside (greater than 2g/m2), or high dose cyclophosphamide (greater than 1g/m2) | G359      |
| Single injection (for agents other than doxorubicin, cisplatin, bleomycin or high dose methotrexate)                                                                                                                                                                                                                                                                 | G381      |
| Supervision of chemotherapy (marrow suppressant) for malignant or autoimmune disease by telephone - monthly                                                                                                                                                                                                                                                          | G382      |
| Arteries-cannulation-chemotherapy-hepatic (TACE)                                                                                                                                                                                                                                                                                                                     | R776      |
| <i>Supportive/Palliative care</i>                                                                                                                                                                                                                                                                                                                                    |           |
| General/Family Practice special palliative care consultation                                                                                                                                                                                                                                                                                                         | A945      |
| Special palliative care consultation hospital in patient                                                                                                                                                                                                                                                                                                             | C945      |
| Palliative care                                                                                                                                                                                                                                                                                                                                                      | C982      |
| Palliative care support individual care 1/2 hr. or major part                                                                                                                                                                                                                                                                                                        | K023      |

1  
2  
3  
4  
5  
6  
7  
8  
9  
10  
11  
12  
13  
14  
15  
16  
17  
18  
19  
20  
21  
22  
23  
24  
25  
26  
27  
28  
29  
30  
31  
32  
33  
34  
35  
36  
37  
38  
39  
40  
41  
42  
43  
44  
45  
46  
47  
48  
49  
50  
51  
52  
53  
54  
55  
56  
57  
58  
59  
60

CCI, Canadian Classification of Health Interventions – is the new national standard for classifying health care procedures. CCI is the companion classification system to ICD-10-CA. CCI replaces the Canadian Classification of Diagnostic, Therapeutic and Surgical Procedures (CCP) and the intervention portion of ICD-9-CM in Canada. CCP was originally developed by Statistics Canada in 1978 to meet Canadian needs for a procedural classification to be used in conjunction with ICD-9. The Ontario Health Insurance Plan (OHIP), physician billing claims dataset contains service and diagnosis information for outpatient visits in Ontario.

Confidential

Table A2. Characteristics of individuals diagnosed with hepatocellular carcinoma by gender and year of diagnosis

|                                 | Female      |             |             |             |             | Male        |             |             |             |              |
|---------------------------------|-------------|-------------|-------------|-------------|-------------|-------------|-------------|-------------|-------------|--------------|
|                                 | 1990-1994   | 1995-1999   | 2000-2004   | 2005-2009   | Total       | 1990-1994   | 1995-1999   | 2000-2004   | 2005-2009   | Total        |
|                                 | N (%)       | N (%)       | N (%)       | N (%)       | N (%)       | N (%)       | N (%)       | N (%)       | N (%)       | N (%)        |
| Age at diagnosis (years)        | N=177       | N=229       | N=352       | N=475       | N=1233      | N=541       | N=820       | N=1229      | N=1822      | N=4412       |
| <60                             | 62 (35.03)  | 56 (24.45)  | 77 (21.88)  | 125 (26.32) | 320 (25.95) | 167 (30.87) | 262 (31.95) | 468 (38.08) | 683 (37.49) | 1580 (35.81) |
| 60-69                           | 57 (32.20)  | 73 (31.88)  | 102 (28.98) | 113 (23.79) | 345 (27.98) | 213 (39.37) | 266 (32.44) | 349 (28.40) | 479 (26.29) | 1307 (29.62) |
| 70-79                           | 38 (21.47)  | 79 (34.50)  | 132 (37.50) | 150 (31.58) | 399 (32.36) | 133 (24.58) | 244 (29.76) | 334 (27.18) | 485 (26.62) | 1196 (27.11) |
| ≥80                             | 20 (11.30)  | 21 (9.17)   | 41 (11.65)  | 87 (18.32)  | 169 (13.71) | 28 (5.18)   | 48 (5.85)   | 78 (6.35)   | 175 (9.60)  | 329 (7.46)   |
| Charlson-Deyo Comorbidity Index |             |             |             |             |             |             |             |             |             |              |
| 0                               | 55 (31.07)  | 101 (44.10) | 135 (38.35) | 162 (34.11) | 453 (36.74) | 169 (31.24) | 330 (40.24) | 432 (35.15) | 540 (29.64) | 1471 (33.34) |
| 1                               | 21 (11.86)  | 31 (13.54)  | 71 (20.17)  | 89 (18.74)  | 212 (17.19) | 104 (19.22) | 187 (22.8)  | 234 (19.04) | 379 (20.80) | 904 (20.49)  |
| 2                               | 17 (9.60)   | 37 (16.16)  | 40 (11.36)  | 73 (15.37)  | 167 (13.54) | 45 (8.32)   | 94 (11.46)  | 156 (12.69) | 238 (13.06) | 533 (12.08)  |
| ≥3                              | 6 (3.39)    | 22 (9.61)   | 35 (9.94)   | 42 (8.84)   | 105 (8.52)  | 19 (3.51)   | 77 (9.39)   | 143 (11.64) | 222 (12.18) | 461 (10.45)  |
| No hospitalization record       | 78 (44.07)  | 38 (16.59)  | 71 (20.17)  | 109 (22.95) | 296 (24.01) | 204 (37.71) | 132 (16.1)  | 264 (21.48) | 443 (24.31) | 1043 (23.64) |
| HCC treatments                  |             |             |             |             |             |             |             |             |             |              |
| Curative                        | 29 (16.38)  | 59 (25.76)  | 105 (29.83) | 179 (37.68) | 372 (30.17) | 82 (15.16)  | 193 (23.54) | 400 (32.55) | 688 (37.76) | 1363 (30.89) |
| Noncurative                     | 24 (13.56)  | 32 (13.97)  | 54 (15.34)  | 96 (20.21)  | 206 (16.71) | 77 (14.23)  | 98 (11.95)  | 223 (18.14) | 417 (22.89) | 815 (18.47)  |
| Palliative care                 | 17 (9.60)   | 80 (34.93)  | 160 (45.45) | 220 (46.32) | 477 (38.69) | 72 (13.31)  | 233 (28.41) | 542 (44.10) | 841 (46.16) | 1688 (38.26) |
| No treatment                    | 120 (67.80) | 105 (45.85) | 119 (33.81) | 116 (24.42) | 460 (37.31) | 352 (65.06) | 412 (50.24) | 372 (30.27) | 400 (21.95) | 1536 (34.81) |

Table A3. Relative survival after diagnosis of hepatocellular carcinoma by sex, year of diagnosis, and age at diagnosis: Sensitivity analysis, merging age at diagnosis 70-79 and  $\geq 80$  years

| Year of Diagnosis | Age at Diagnosis (years) | Cases (N) | Events (N) | 1-year Relative Survival % (95% CI) | 5-year Relative Survival % (95% CI) |
|-------------------|--------------------------|-----------|------------|-------------------------------------|-------------------------------------|
| Cohort Analysis   |                          |           |            |                                     |                                     |
| Female            |                          |           |            |                                     |                                     |
| 1990-1994         | < 60                     | 62        | 48         | 38.27 (27.09, 49.35)                | 17.44 (9.45, 27.48)                 |
|                   | 60-69                    | 57        | 45         | 28.97 (18.74, 40.01)                | 11.01 (4.92, 19.95)                 |
|                   | $\geq 70$                | 58        | 54         | 11.85 (6.62, 18.78)                 | 0.03 (0.00, 0.42)                   |
| 1995-1999         | < 60                     | 56        | 29         | 49.19 (36.10, 61.04)                | 25.92 (15.10, 38.17)                |
|                   | 60-69                    | 73        | 42         | 54.51 (43.21, 64.52)                | 19.28 (11.28, 28.99)                |
|                   | $\geq 70$                | 100       | 80         | 23.09 (16.59, 30.27)                | 6.97 (3.12, 13.11)                  |
| 2000-2004         | < 60                     | 77        | 45         | 51.77 (40.65, 61.79)                | 20.44 (11.90, 30.62)                |
|                   | 60-69                    | 102       | 65         | 42.00 (32.85, 50.89)                | 17.61 (10.75, 25.94)                |
|                   | $\geq 70$                | 173       | 127        | 46.16 (38.61, 53.43)                | 10.12 (5.85, 15.86)                 |
| 2005-2009         | < 60                     | 125       | 47         | 70.93 (62.18, 78.03)                | 27.69 (18.27, 37.93)                |
|                   | 60-69                    | 113       | 63         | 54.27 (44.83, 62.80)                | 19.36 (11.87, 28.29)                |
|                   | $\geq 70$                | 237       | 164        | 47.60 (41.17, 53.81)                | 10.00 (5.92, 15.44)                 |
| Male              |                          |           |            |                                     |                                     |
| 1990-1994         | < 60                     | 167       | 120        | 31.81 (25.52, 38.27)                | 7.13 (3.84, 11.80)                  |
|                   | 60-69                    | 213       | 165        | 28.08 (23.00, 33.37)                | 10.56 (7.04, 14.93)                 |
|                   | $\geq 70$                | 161       | 142        | 18.61 (13.7, 24.16)                 | 4.15 (1.73, 8.38)                   |
| 1995-1999         | < 60                     | 262       | 175        | 35.82 (30.62, 41.05)                | 15.14 (11.14, 19.71)                |
|                   | 60-69                    | 266       | 191        | 34.53 (29.32, 39.80)                | 12.61 (8.90, 17.04)                 |
|                   | $\geq 70$                | 292       | 218        | 32.29 (27.54, 37.15)                | 10.26 (6.93, 14.43)                 |
| 2000-2004         | < 60                     | 468       | 239        | 52.47 (48.07, 56.67)                | 27.53 (23.33, 31.89)                |
|                   | 60-69                    | 349       | 234        | 43.98 (38.92, 48.94)                | 17.33 (13.40, 21.71)                |
|                   | $\geq 70$                | 412       | 280        | 44.41 (39.74, 49.01)                | 11.64 (8.48, 15.41)                 |
| 2005-2009         | < 60                     | 683       | 373        | 56.94 (53.20, 60.50)                | 25.13 (21.39, 29.04)                |
|                   | 60-69                    | 479       | 269        | 52.68 (48.26, 56.91)                | 22.85 (18.76, 27.22)                |
|                   | $\geq 70$                | 660       | 439        | 51.72 (47.8, 55.52)                 | 14.35 (11.17, 17.98)                |

CI, confidence intervals.
