# Supplementary material
Source: PubMed Central journal article supplement (PMC4565177)
Supplement: supp_3.2.E208_STROBE_checklist.pdf [file supp_3.2.E208_STROBE_checklist.pdf]

## Research checklist\*

|                              | Item | Recommendation                                                                                                                                                                                                                                                                                                                                                                                                                           | Reported on manuscript page |
|------------------------------|------|------------------------------------------------------------------------------------------------------------------------------------------------------------------------------------------------------------------------------------------------------------------------------------------------------------------------------------------------------------------------------------------------------------------------------------------|-----------------------------|
| <b>Title and abstract</b>    |      |                                                                                                                                                                                                                                                                                                                                                                                                                                          |                             |
|                              | 1    | (a) Indicate the study's design with a commonly used term in the title or the abstract                                                                                                                                                                                                                                                                                                                                                   | Page 1                      |
|                              |      | (b) Provide in the abstract an informative and balanced summary of what was done and what was found                                                                                                                                                                                                                                                                                                                                      | Page 4                      |
| <b>Introduction</b>          |      |                                                                                                                                                                                                                                                                                                                                                                                                                                          |                             |
| Background/rationale         | 2    | Explain the scientific background and rationale for the investigation being reported                                                                                                                                                                                                                                                                                                                                                     | Page 5                      |
| Objectives                   | 3    | State specific objectives, including any prespecified hypotheses                                                                                                                                                                                                                                                                                                                                                                         | Page 5                      |
| <b>Methods</b>               |      |                                                                                                                                                                                                                                                                                                                                                                                                                                          |                             |
| Study design                 | 4    | Present key elements of study design early in the paper                                                                                                                                                                                                                                                                                                                                                                                  | Pages 5-9                   |
| Setting                      | 5    | Describe the setting, locations, and relevant dates, including periods of recruitment, exposure, follow-up, and data collection                                                                                                                                                                                                                                                                                                          | Pages 6-8                   |
| Participants                 | 6    | (a) Cohort study—give the eligibility criteria, and the sources and methods of selection of participants. Describe methods of follow-up Case-control study—give the eligibility criteria, and the sources and methods of case ascertainment and control selection. Give the rationale for the choice of cases and controls Cross-sectional study—give the eligibility criteria, and the sources and methods of selection of participants | Pages 6-8                   |
|                              |      | (b) Cohort study—for matched studies, give matching criteria and number of exposed and unexposed Case-control study—for matched studies, give matching criteria and the number of controls per case                                                                                                                                                                                                                                      | Page 8                      |
| Variables                    | 7    | Clearly define all outcomes, exposures, predictors, potential confounders, and effect modifiers. Give diagnostic criteria, if applicable                                                                                                                                                                                                                                                                                                 | Pages 6-9                   |
| Data sources/<br>measurement | 8    | For each variable of interest give sources of data and details of methods of assessment (measurement). Describe comparability of assessment methods if there is more than one group                                                                                                                                                                                                                                                      | Pages 7-9                   |
| Bias                         | 9    | Describe any efforts to address potential sources of bias                                                                                                                                                                                                                                                                                                                                                                                | Pages 7-9                   |
| Study size                   | 10   | Explain how the study size was arrived at                                                                                                                                                                                                                                                                                                                                                                                                | Page 6                      |
| Quantitative variables       | 11   | Explain how quantitative variables were handled in the analyses. If applicable, describe which groupings were chosen, and why                                                                                                                                                                                                                                                                                                            | Pages 7-9                   |
| Statistical methods          | 12   | (a) Describe all statistical methods, including those used to control for confounding                                                                                                                                                                                                                                                                                                                                                    | Pages 7-9                   |
|                              |      | (b) Describe any methods used to examine subgroups and interactions                                                                                                                                                                                                                                                                                                                                                                      | Pages 8-9                   |
|                              |      | (c) Explain how missing data were addressed                                                                                                                                                                                                                                                                                                                                                                                              | Pages 7-8                   |
|                              |      | (d) Cohort study—if applicable, explain how loss to follow-up was addressed Case-control study—if applicable, explain how matching of cases and controls was addressed Cross-sectional study—if applicable, describe analytical methods taking account of sampling strategy                                                                                                                                                              | Pages 8-9                   |
|                              |      | (e) Describe any sensitivity analyses                                                                                                                                                                                                                                                                                                                                                                                                    | Page 14                     |
| <b>Results</b>               |      |                                                                                                                                                                                                                                                                                                                                                                                                                                          |                             |
| Participants                 | 13   | (a) Report the numbers of individuals at each stage of the study—eg, numbers potentially eligible, examined                                                                                                                                                                                                                                                                                                                              | Page 9, Table 1, Appendix   |

|                          |    |                                                                                                                                                                                                                                                     |                                   |
|--------------------------|----|-----------------------------------------------------------------------------------------------------------------------------------------------------------------------------------------------------------------------------------------------------|-----------------------------------|
|                          |    | for eligibility, confirmed eligible, included in the study, completing follow-up, and analysed                                                                                                                                                      | Table A2                          |
|                          |    | (b) Give reasons for non-participation at each stage                                                                                                                                                                                                | Not applicable                    |
|                          |    | (c) Consider use of a flow diagram                                                                                                                                                                                                                  | Not applicable                    |
| Descriptive data         | 14 | (a) Give characteristics of study participants (eg, demographic, clinical, social) and information on exposures and potential confounders                                                                                                           | Page 9                            |
|                          |    | (b) Indicate the number of participants with missing data for each variable of interest                                                                                                                                                             | Table A2                          |
|                          |    | (c) Cohort study—summarise follow-up time (eg, average and total amount)                                                                                                                                                                            | Page 9                            |
| Outcome data             | 15 | Cohort study—report numbers of outcome events or summary measures over time Case-control study—report numbers in each exposure category, or summary measures of exposure Cross-sectional study—report numbers of outcome events or summary measures | Page 9, Table 1                   |
| Main results             | 16 | (a) Give unadjusted estimates and, if applicable, confounder-adjusted estimates and their precision (eg, 95% confidence interval). Make clear which confounders were adjusted for and why they were included                                        | Pages 10-11, Tables 1-3           |
|                          |    | (b) Report category boundaries when continuous variables were categorised                                                                                                                                                                           | Pages 10-11, Tables 1-3           |
|                          |    | (c) If relevant, consider translating estimates of relative risk into absolute risk for a meaningful time period                                                                                                                                    | Not applicable                    |
| Other analyses           | 17 | Report other analyses done—eg, analyses of subgroups and interactions, and sensitivity analyses                                                                                                                                                     | Pages 10-11, Tables 2-3, Table A3 |
| <b>Discussion</b>        |    |                                                                                                                                                                                                                                                     |                                   |
| Key results              | 18 | Summarise key results with reference to study objectives                                                                                                                                                                                            | Pages 11-13                       |
| Limitations              | 19 | Discuss limitations of the study, taking into account sources of potential bias or imprecision. Discuss both direction and magnitude of any potential bias                                                                                          | Pages 13-14                       |
| Interpretation           | 20 | Give a cautious overall interpretation of results considering objectives, limitations, multiplicity of analyses, results from similar studies, and other relevant evidence                                                                          | Pages 11-13                       |
| Generalisability         | 21 | Discuss the generalisability (external validity) of the study results                                                                                                                                                                               | Pages 12-13                       |
| <b>Other information</b> |    |                                                                                                                                                                                                                                                     |                                   |
| Funding                  | 22 | Give the source of funding and the role of the funders for the present study and, if applicable, for the original study on which the present article is based                                                                                       | Page 2                            |

\* von Elm E, Altman DG, Egger M, Pocock SJ, Gøtzsche PC, Vandenbroucke JP. The Strengthening of Reporting of Observational Studies in Epidemiology (STROBE) statement: guidelines for reporting observational studies. *Lancet* 2007;370:1453-7.
